# Supplementary material for: Estimating the Risk of Chronic Pain: Development and Validation of a Prognostic Model (PICKUP) for Patients with Acute Low Back Pain
Source: PLoS Med. 2016 May 17;13(5):e1002019. doi: 10.1371/journal.pmed.1002019 (PMC4871494; doi:10.1371/journal.pmed.1002019)
Supplement: S1 Data — (XLSX) [file pmed.1002019.s001.xlsx]

## Sheet: Sheet1
Outcome 1	Outcome 2	Outcome 3	Item 1	Item 2	Item 3	Item 4	Item 5	Item 6	Item 7	Probability 1	Probability 2	Probability 3	Probability 4	Cohort
0	0	0	0	0	3	1	2	0	4	0.13	0.06	0.19	0.1	2
0	0	0	0	0	4	0	0	0	2	0.12	0.06	0.12	0.09	1
0	0	0	0	0	4	0	6	0	3	0.23	0.12	0.25	0.16	2
0	0	0	0	0	4	7	7	1	3	0.34	0.19	0.38	0.24	1
0	0	0	0	0	5	5	3	0	3	0.25	0.11	0.31	0.18	1
0	0	0	0	0	3	0	0	0	3	0.1	0.04	0.12	0.08	2
0	0	0	0	0	3	0	3	1	2	0.14	0.09	0.13	0.1	1
0	0	0	0	1	6	0	8	0	1	0.48	0.36	0.4	0.35	2
1	0	0	1	0	6	0	0	1	1	0.25	0.19	0.21	0.18	1
0	0	0	0	0	4	2	2	0	3	0.17	0.07	0.2	0.12	2
0	0	0	0	0	5	0	5	1	1	0.24	0.19	0.19	0.17	2
0	0	0	0	0	4	7	4	0	3	0.26	0.1	0.3	0.18	2
0	0	0	0	0	2	2	2	0	1	0.12	0.04	0.08	0.09	2
0	0	0	1	0	2	5	1	1	2	0.19	0.08	0.16	0.13	1
0	0	0	0	0	4	0	0	1	2	0.12	0.08	0.12	0.09	2
0	0	0	0	0	4	0	4	1	1	0.19	0.14	0.14	0.14	2
1	0	0	0	1	5	9	9	0	3	0.59	0.33	0.64	0.45	2
0	0	0	0	0	4	5	5	1	3	0.26	0.15	0.3	0.19	2
1	1	0	0	0	4	0	8	1	2	0.28	0.22	0.25	0.2	2
1	1	1	0	0	5	1	10	0	3	0.4	0.25	0.42	0.28	1
0	0	0	0	0	5	1	0	0	3	0.15	0.07	0.19	0.11	1
0	0	0	0	0	5	7	8	1	1	0.42	0.27	0.35	0.3	2
0	0	0	0	0	3	1	2	0	3	0.13	0.06	0.15	0.1	2
0	0	0	0	1	2	0	0	0	3	0.12	0.06	0.14	0.09	2
0	0	0	0	0	3	1	8	0	4	0.25	0.12	0.31	0.18	1
			0	0	2	3	3	1	2	0.14	0.07	0.12	0.1	2
0	0	0	0	0	5	0	4	0	2	0.22	0.12	0.22	0.16	2
0	0	0	0	0	4	4	5	0	3	0.25	0.11	0.28	0.18	1
0	0	0	0	0	4	3	4	0	2	0.22	0.1	0.21	0.15	2
0	0	0	0	0	6	8	8	1	2	0.49	0.33	0.49	0.35	1
0	0	0	0	0	4	6	4	0	4	0.25	0.1	0.34	0.18	1
			0	0	4	0	6	1	3	0.23	0.17	0.25	0.16	2
0	0	0	1	1	5	9	6	1	3	0.62	0.42	0.66	0.47	1
1	1	1	0	1	6	10	10	0	3	0.68	0.42	0.73	0.53	2
1	0	0	0	0	2	3	7	1	1	0.21	0.12	0.15	0.15	2
0	0	1	0	0	3	0	1	0	2	0.11	0.05	0.11	0.08	1
1	1	1	1	1	5	9	9	0	2	0.7	0.42	0.68	0.56	1
1	1	1	0	0	5	2	3	0	2	0.22	0.11	0.22	0.16	1
0	0	0	0	0	6	0	3	1	2	0.23	0.19	0.24	0.17	2
0	0	0	0	0	5	6	6	0	2	0.34	0.16	0.34	0.25	1
0	0	0	0	0	5	8	5	1	4	0.34	0.19	0.46	0.24	2
0	0	0	0	0	3	0	0	0	2	0.1	0.04	0.1	0.08	2
0	0	0	0	0	3	0	10	0	3	0.29	0.16	0.29	0.21	2
0	0	0	0	0	3	4	2	0	3	0.15	0.06	0.18	0.11	2
0	0	0	0	0	5	6	6	0	1	0.34	0.16	0.29	0.25	2
0	0	0	0	0	3	4	4	0	2	0.19	0.07	0.18	0.14	2
0	0	0	0	0	4	0	1	0	1	0.13	0.06	0.11	0.1	1
1	1	1	0	0	4	7	7	0	1	0.34	0.14	0.27	0.24	1
0	0	0	0	0	5	8	7	1	3	0.4	0.24	0.46	0.29	1
1	1	1	0	0	5	7	6	1	3	0.36	0.22	0.41	0.26	1
0	0	0	0	0	3	5	10	1	5	0.36	0.22	0.48	0.25	2
0	0	0	0	1	4	7	9	1	4	0.51	0.35	0.6	0.38	2
0	0	0	0	0	4	0	0	0	2	0.12	0.06	0.12	0.09	2
0	0	0	0	0	5	1	9	0	2	0.37	0.22	0.34	0.26	1
1	1	0	0	0	5	8	8	0	2	0.44	0.2	0.42	0.31	2
1	1	1	0	0	5	0	10	1	2	0.38	0.33	0.35	0.27	1
0	0	0	0	0	4	0	2	0	2	0.15	0.07	0.15	0.11	1
0	0	0	0	0	5	0	1	0	2	0.16	0.08	0.16	0.12	1
0	0	0	0	0	2	0	2	1	3	0.11	0.06	0.12	0.08	2
0	0	0	0	1	4	5	5	1	3	0.36	0.24	0.4	0.25	2
0	0	0	0	0	6	3	5	0	1	0.32	0.18	0.27	0.23	2
0	0	0	1	0	4	0	2	0	4	0.23	0.11	0.3	0.16	1
0	0	0	0	0	5	0	6	0	2	0.27	0.16	0.26	0.19	1
0	0	0	0	0	3	3	3	0	4	0.16	0.07	0.23	0.12	2
1	0	1	0	0	4	0	0	0	1	0.12	0.06	0.1	0.09	1
0	0	0	0	0	4	0	0	0	2	0.12	0.06	0.12	0.09	2
1	0	1	0	0	5	3	6	1	2	0.31	0.22	0.3	0.22	1
1	1	1	0	0	4	7	7	0	3	0.34	0.14	0.38	0.24	1
0	0	0	0	0	5	0	5	0	2	0.24	0.14	0.23	0.17	2
0	0	0	0	1	2	2	3	0	2	0.19	0.08	0.17	0.14	2
0	0	0	1	0	5	5	2	0	3	0.33	0.14	0.38	0.23	1
0	0	0	0	0	3	4	5	1	2	0.21	0.12	0.19	0.15	1
0	0	0	0	1	5	4	7	0	3	0.45	0.27	0.5	0.33	2
0	0	0	0	0	4	0	1	0	3	0.13	0.06	0.16	0.1	1
0	0	0	0	0	4	4	9	0	1	0.36	0.18	0.28	0.26	1
1	1	1	0	1	5	0	3	0	3	0.28	0.17	0.33	0.2	1
0	0	0	0	0	4	1	5	0	3	0.22	0.11	0.25	0.16	1
0	0	0	0	0	4	7	4	0	3	0.26	0.1	0.3	0.18	1
0	0	0	0	1	5	6	5	0	3	0.42	0.22	0.48	0.3	1
1	0	0	1	0	4	2	8	0	3	0.42	0.22	0.43	0.3	1
1	1	1	0	1	4	0	8	0	2	0.38	0.24	0.34	0.27	2
0	0	0	0	0	2	1	1	0	3	0.1	0.04	0.11	0.07	2
1	0	1	0	1	5	7	7	0	3	0.5	0.27	0.55	0.36	1
1	0	0	0	0	2	2	7	1	2	0.2	0.12	0.17	0.15	2
0	0	0	0	0	4	0	2	1	1	0.15	0.11	0.12	0.11	2
1	0	0	0	0	5	5	7	0	4	0.36	0.18	0.47	0.26	2
0	0	0	0	0	2	0	1	0	2	0.09	0.04	0.08	0.07	2
1	0	1	0	0	5	2	1	1	1	0.18	0.12	0.15	0.13	2
0	0	0	0	0	5	2	4	1	2	0.24	0.17	0.24	0.17	2
0	0	0	0	0	4	0	2	0	2	0.15	0.07	0.15	0.11	1
0	0	0	0	0	4	4	7	1	3	0.3	0.19	0.33	0.22	2
1	1	1	1	0	5	6	8	0	2	0.53	0.27	0.49	0.39	1
1	0	1	0	0	5	0	7	0	3	0.3	0.18	0.33	0.21	1
0	0	0	0	0	2	6	8	1	3	0.27	0.14	0.28	0.19	2
0	0	0	0	0	3	0	6	0	2	0.2	0.1	0.17	0.14	1
0	0	0	0	1	2	0	5	1	1	0.21	0.15	0.15	0.15	2
0	0	0	0	0	2	3	5	0	3	0.17	0.07	0.18	0.12	2
0	0	0	1	0	5	4	10	0	4	0.56	0.33	0.64	0.42	2
0	0	0	0	0	3	3	2	1	3	0.15	0.08	0.17	0.11	2
0	0	0	0	1	2	3	1	0	3	0.16	0.06	0.19	0.12	1
0	0	0	0	0	2	0	0	1	1	0.08	0.05	0.06	0.06	2
0	0	0	0	0	3	2	1	0	3	0.12	0.05	0.15	0.09	2
0	0	0	0	1	4	7	9	0	3	0.51	0.27	0.54	0.38	2
0	0	0	0	0	4	0	5	0	2	0.21	0.11	0.19	0.15	2
0	0	0	0	0	5	0	0	0	1	0.14	0.07	0.12	0.11	1
0	0	0	0	0	3	0	6	1	2	0.2	0.14	0.17	0.14	2
1	0	1	0	1	5	6	4	1	2	0.39	0.26	0.39	0.28	1
0	0	0	0	0	3	0	2	0	2	0.13	0.06	0.12	0.09	1
0	0	1	0	1	5	5	3	0	3	0.34	0.17	0.41	0.24	1
0	0	0	0	0	5	0	1	0	2	0.16	0.08	0.16	0.12	1
0	0	0	0	0	3	0	0	1	1	0.1	0.06	0.08	0.08	2
0	0	0	0	0	5	4	5	1	3	0.29	0.19	0.34	0.21	1
0	0	0	0	0	5	6	8	1	2	0.41	0.27	0.39	0.29	2
0	0	0	0	0	5	0	3	1	2	0.2	0.15	0.2	0.14	2
0	0	0	0	0	4	0	5	0	3	0.21	0.11	0.23	0.15	2
1	1		1	0	4	8	7	1	1	0.47	0.27	0.38	0.35	2
0	0	0	0	0	4	0	7	0	1	0.25	0.14	0.19	0.18	2
1	1	0	0	1	5	5	6	1	3	0.44	0.32	0.49	0.31	2
0	0	0	0	0	5	0	3	0	4	0.2	0.11	0.29	0.14	2
0	0	0	0	1	4	6	6	0	3	0.4	0.19	0.44	0.29	1
0	0	0	0	0	4	0	1	0	2	0.13	0.06	0.13	0.1	2
0	0	0	0	0	4	0	0	1	1	0.12	0.08	0.1	0.09	2
1	1	1	0	0	2	0	4	1	3	0.13	0.08	0.14	0.1	2
0	0	0	0	0	4	0	10	0	2	0.34	0.2	0.29	0.24	2
1	1	1	1	0	5	7	2	1	2	0.35	0.19	0.35	0.25	1
0	0	0	0	0	3	1	7	0	2	0.23	0.11	0.2	0.16	1
0	0	0	0	1	4	5	6	1	3	0.39	0.26	0.43	0.28	2
1	1	1	0	1	5	10	10	1	4	0.64	0.45	0.73	0.49	1
1	0	0	0	0	3	2	2	0	2	0.14	0.06	0.13	0.1	1
0	0	0	0	0	3	10	0	0	2	0.17	0.04	0.17	0.12	1
0	0	1	1	0	5	5	4	0	2	0.39	0.18	0.37	0.28	1
0	0	0	0	0	4	1	6	0	2	0.24	0.12	0.22	0.17	2
0	0	0	0	0	4	10	0	1	1	0.2	0.08	0.17	0.14	2
0	0	0	1	0	3	3	4	1	3	0.27	0.15	0.28	0.19	2
0	0	0	0	1	6	0	3	0	1	0.32	0.21	0.28	0.23	1
0	0	0	0	1	4	7	7	1	2	0.45	0.29	0.43	0.32	1
0	0	0	0	0	4	0	5	0	2	0.21	0.11	0.19	0.15	2
1	1	1	0	1	3	5	7	1	2	0.37	0.24	0.34	0.26	2
0	0	0	0	0	4	3	1	1	2	0.16	0.09	0.16	0.11	1
0	0	0	0	0	5	0	1	1	2	0.16	0.12	0.16	0.12	2
0	0	0	0	1	4	2	4	1	3	0.29	0.21	0.33	0.21	2
0	0	0	0	0	5	3	4	0	2	0.25	0.12	0.25	0.18	1
0	0	0	0	0	5	10	5	0	2	0.37	0.14	0.38	0.26	1
0	0	0	0	0	1	0	5	0	2	0.12	0.05	0.1	0.09	2
0	0	0	0	1	5	4	8	0	2	0.49	0.3	0.47	0.35	2
0	0	0	0	1	2	0	2	0	3	0.15	0.07	0.17	0.11	2
0	0	0	1	0	5	4	7	0	2	0.47	0.25	0.43	0.34	1
0	0	0	1	0	1	0	1	0	1	0.12	0.04	0.08	0.09	2
0	0	0	1	0	5	3	5	1	2	0.39	0.27	0.36	0.28	1
0	0	0	0	0	1	0	3	0	1	0.1	0.04	0.07	0.07	1
0	0	0	0	0	4	1	3	0	2	0.18	0.08	0.17	0.13	1
1	1	1	0	1	4	6	1	0	1	0.26	0.11	0.22	0.18	1
1	1	1	0	0	5	8	8	1	3	0.44	0.27	0.48	0.31	1
0	0	0	0	1	4	0	4	0	1	0.26	0.15	0.21	0.19	2
0	0	1	0	0	4	4	4	0	3	0.23	0.1	0.26	0.16	1
0	0	0	0	0	3	3	3	0	4	0.16	0.07	0.23	0.12	1
0	0	0	0	0	2	7	5	0	2	0.21	0.07	0.19	0.15	2
0	0	0	0	0	5	1	2	0	4	0.19	0.1	0.28	0.14	2
0	0	0	0	0	2	6	5	1	2	0.2	0.09	0.18	0.14	2
0	0	0	0	0	4	0	1	1	2	0.13	0.09	0.13	0.1	1
0	0	0	0	0	5	0	7	0	2	0.3	0.18	0.28	0.21	2
0	0	0	0	0	5	8	9	0	2	0.47	0.22	0.45	0.34	2
1	1	1	0	0	5	0	5	0	1	0.24	0.14	0.19	0.17	2
0	0	0	0	0	4	1	1	0	2	0.14	0.06	0.14	0.1	1
1	1	1	0	0	5	8	6	1	3	0.37	0.22	0.43	0.27	1
0	0	0	0	0	4	0	8	0	3	0.28	0.16	0.3	0.2	2
0	0	0	0	0	2	4	7	0	2	0.22	0.09	0.19	0.16	2
0	0	0	0	0	2	5	5	0	2	0.19	0.07	0.17	0.14	2
0	0	0	0	0	4	2	3	0	3	0.19	0.08	0.22	0.13	2
0	0	0	0	0	4	0	0	1	2	0.12	0.08	0.12	0.09	2
1	1	0	0	0	4	3	2	1	4	0.18	0.11	0.25	0.13	2
1	0	1	0	0	2	3	2	1	3	0.12	0.06	0.14	0.09	2
0	0	0	0	0	4	1	5	0	4	0.22	0.11	0.29	0.16	2
0	0	1	0	0	6	10	2	1	4	0.33	0.17	0.48	0.23	1
0	0	0	0	0	4	10	6	0	2	0.35	0.12	0.34	0.25	2
0	0	0	0	0	4	0	4	0	3	0.19	0.1	0.21	0.14	2
0	0	0	0	0	4	0	3	1	2	0.17	0.12	0.16	0.12	1
0	0	0	0	1	5	6	6	1	3	0.45	0.32	0.51	0.33	2
1	1	1	1	1	5	4	8	1	2	0.61	0.49	0.57	0.46	1
1	1	1	1	0	6	10	10	1	3	0.7	0.49	0.72	0.55	1
0	0	0	0	0	5	8	7	0	2	0.4	0.18	0.4	0.29	2
0	0	0	0	0	5	6	3	0	3	0.26	0.11	0.32	0.19	1
0	0	0	0	0	4	4	4	0	3	0.23	0.1	0.26	0.16	2
0	0	0	0	0	4	5	4	0	2	0.24	0.1	0.23	0.17	2
0	0	1	0	1	2	4	7	0	4	0.31	0.14	0.38	0.22	2
0	0	0	0	0	4	0	1	0	3	0.13	0.06	0.16	0.1	1
1	0	1	0	0	5	0	8	1	2	0.32	0.27	0.3	0.23	1
0	0	0	0	0	4	8	5	0	1	0.3	0.11	0.24	0.21	2
0	0	0	0	0	4	0	1	0	2	0.13	0.06	0.13	0.1	1
0	0	0	0	0	5	1	4	0	2	0.23	0.12	0.23	0.17	1
1	0	0	0	0	5	4	5	1	2	0.29	0.19	0.29	0.21	2
1	1	1	0	0	4	2	5	0	2	0.23	0.11	0.21	0.16	2
0	0	0	0	0	4	0	9	0	2	0.31	0.18	0.27	0.22	1
1	0	0	1	0	4	6	8	0	3	0.48	0.22	0.49	0.35	2
1	1	1	0	0	5	4	9	1	3	0.41	0.3	0.44	0.29	1
0	0	0	0	0	3	0	0	1	3	0.1	0.06	0.12	0.08	2
			0	0	4	0	5	0	3	0.21	0.11	0.23	0.15	2
0	0	0	0	0	2	9	2	0	4	0.17	0.04	0.24	0.12	2
1	0	1		1	3	0	5	0	3					2
0	0	0	0	0	4	5	0	1	2	0.16	0.08	0.16	0.11	2
0	0	0	0	0	5	1	2	1	3	0.19	0.14	0.23	0.14	1
0	0	0	0	1	4	0	6	0	2	0.32	0.19	0.3	0.23	2
0	0	0	0	1	4	4	6	1	1	0.37	0.26	0.3	0.27	2
0	0	0	0	1	3	2	1	0	2	0.18	0.08	0.18	0.13	1
0	0	0	0	0	5	0	0	1	3	0.14	0.11	0.18	0.11	1
1	1	1	0	0	5	1	7	0	3	0.31	0.18	0.34	0.22	1
0	0	0	1	0	4	3	10	0	3	0.5	0.27	0.5	0.36	1
1	0	1	0	0	5	0	5	0	1	0.24	0.14	0.19	0.17	1
0	0	0	0	0	6	0	10	0	3	0.43	0.3	0.47	0.31	2
0	0	0	0	0	3	0	0	0	2	0.1	0.04	0.1	0.08	2
0	0	1	0	0	5	8	8	1	4	0.44	0.27	0.54	0.31	2
0	0	0	0	0	5	7	10	0	3	0.49	0.25	0.52	0.35	2
1	1	0	0	1	4	0	3	1	3	0.24	0.19	0.28	0.17	2
0	0	0	0	0	2	0	3	1	1	0.12	0.07	0.08	0.09	2
0	0	1	0	0	4	1	7	0	3	0.27	0.14	0.29	0.19	2
0	0	0	1	0	4	0	5	0	1	0.3	0.16	0.22	0.21	2
0	0	0	0	1	4	7	7	0	3	0.45	0.22	0.49	0.32	2
1	1	1	0	0	4	5	10	0	5	0.4	0.2	0.55	0.29	2
0	0	0	0	0	3	0	5	0	3	0.18	0.08	0.19	0.13	1
0	0	0	1	0	2	2	5	1	4	0.24	0.14	0.29	0.17	2
0	0	0	0	0	5	2	0	1	2	0.16	0.11	0.17	0.12	2
0	0	0	0	0	4	0	2	1	1	0.15	0.11	0.12	0.11	2
0	0	0	0	0	5	0	0	0	3	0.14	0.07	0.18	0.11	1
0	0	0	0	0	4	1	1	0	2	0.14	0.06	0.14	0.1	1
0	0	0	0	0	3	2	1	1	2	0.12	0.07	0.12	0.09	2
0	0	0	0	0	5	0	3	1	2	0.2	0.15	0.2	0.14	2
			1	0	3	0	4	0	2	0.24	0.11	0.2	0.17	2
0	0	0	1	0	5	3	8	1	3	0.49	0.36	0.51	0.35	1
0	0	0	1	0	2	0	4	0	2	0.2	0.08	0.16	0.14	2
1	0	1	0	0	5	2	5	1	3	0.27	0.19	0.31	0.19	1
0	0	0	0	0	4	7	4	1	3	0.26	0.14	0.3	0.18	1
0	0	0	0	0	5	7	5	0	4	0.33	0.14	0.44	0.23	1
0	0	0	0	0	2	5	5	0		0.19	0.07		0.14	2
0	0	0	0	1	4	1	0	1	2	0.18	0.13	0.19	0.13	2
0	0	0	0	0	4	3	4	0	3	0.22	0.1	0.25	0.15	2
0	0	0	0	0	5	4	4	0	4	0.26	0.12	0.37	0.19	1
1	0	1	1	1	5	1	1	0	2	0.34	0.19	0.34	0.24	1
1	1	0	1	0	5	7	7	1	2	0.51	0.33	0.48	0.38	2
0	0	0	0	0	4	0	1	0	2	0.13	0.06	0.13	0.1	1
0	0	0	0	0	2	2	5	0	1	0.16	0.07	0.11	0.12	2
0	0	0	0	0	6	8	4	1	1	0.36	0.22	0.32	0.26	1
			0	0	5	4	6	0	2	0.32	0.16	0.31	0.23	2
0	0	0	0	1	4	6	4	1	3	0.34	0.21	0.39	0.24	2
0	0	0	0	0	2	1	2	1	3	0.11	0.06	0.12	0.08	1
0	0	0	1	0	5	0	8	0	3	0.44	0.27	0.46	0.32	1
0	0	0	0	0	5	3	2	0	2	0.21	0.1	0.21	0.15	1
0	0	0	0	0	5	0	1	0	2	0.16	0.08	0.16	0.12	1
0	0	0	0	0	4	5	6	0	2	0.29	0.12	0.27	0.2	2
0	0	0	0	0	3	2	0	0	4	0.11	0.04	0.17	0.08	2
0	0	0	0	1	5	0	4	1	3	0.31	0.26	0.36	0.22	2
1	0	1	1	0	5	9	4	1	4	0.44	0.24	0.56	0.32	1
1	1	1	0	0	2	0	0	0	2	0.08	0.03	0.08	0.06	2
0	0	0	0	1	3	0	3	1	4	0.2	0.15	0.28	0.15	2
0	0	0	0	0	5	1	8	0	3	0.34	0.2	0.37	0.24	2
0	0	1	0	0	4	8	5	0	4	0.3	0.11	0.4	0.21	1
0	0	0	0	0	4	0	3	1	3	0.17	0.12	0.2	0.12	2
1	1	1	0	1	4	7	7	0	3	0.45	0.22	0.49	0.32	1
0	0	0	0	0	4	6	2	0	2	0.2	0.07	0.2	0.15	2
0	0	0	0	1	4	3	1	1	2	0.22	0.15	0.23	0.16	2
1	1	1	0	1	5	8	7	0	3	0.51	0.27	0.57	0.38	2
0	0	0	0	1	5	7	8	0	2	0.53	0.3	0.52	0.39	2
0	0	0	0	0	4	0	0	1	3	0.12	0.08	0.15	0.09	2
0	0	0	0	0	4	4	3	0	3	0.2	0.08	0.24	0.15	2
0	0	0	1	0	6	0	0	1	1	0.25	0.19	0.21	0.18	2
1	0	1	0	0	4	6	8	0	3	0.36	0.16	0.39	0.25	1
0	0	0	0	0	5	0	3	0	3	0.2	0.11	0.24	0.14	1
1	0	0	1	0	5	3	8	0	3	0.49	0.27	0.51	0.35	1
1	1	1	0	0	3	9	5	1	4	0.27	0.12	0.36	0.19	2
0	0	0	0	1	4	0	8	0	4	0.38	0.24	0.46	0.27	2
0	0	0	0	0	5	6	5	1	2	0.32	0.19	0.31	0.22	1
0	0	0	0	1	5	7	3	0	4	0.37	0.17	0.5	0.26	1
0	0	0	0	0	3	1	3	0	3	0.15	0.07	0.17	0.11	1
0	0	0	0	0	4	0	5	1	3	0.21	0.15	0.23	0.15	2
0	0	0	0	0	5	5	5	0	3	0.3	0.14	0.35	0.22	2
0	0	0	0	0	4	0	1	1	3	0.13	0.09	0.16	0.1	1
			0	0	5	0	5	0	3	0.24	0.14	0.28	0.17	2
0	0	0	0	0	5	2	1	1	4	0.18	0.12	0.27	0.13	1
0	0	0	0	0	5	1	2	1	2	0.19	0.14	0.19	0.14	1
0	0	1	0	0	5	1	3	0	3	0.21	0.11	0.25	0.15	1
0	0	0	0	0	4	0	0	1	3	0.12	0.08	0.15	0.09	1
0	0	0	0	0	3	3	6	0	2	0.23	0.1	0.2	0.16	2
1	1	1	0	0	4	5	7	1	3	0.31	0.19	0.35	0.22	1
0	0	0	0	0	5	8	2	0	3	0.26	0.1	0.32	0.19	2
0	0	0	0	0	5	1	10	1	2	0.4	0.33	0.36	0.28	1
0	0	0	0	0	4	0	0	0	1	0.12	0.06	0.1	0.09	1
0	0	0	0	0	2	1	3	1	3	0.12	0.07	0.14	0.09	2
0	0	0	0	0	4	6	8	0	4	0.36	0.16	0.45	0.25	2
0	0	0	0	0	4	6	5	1	2	0.27	0.15	0.26	0.19	1
1	1	1	0	0	5	6	2	1	3	0.24	0.14	0.3	0.17	1
0	0	0	1	0	5	6	4	0	3	0.4	0.18	0.45	0.29	1
1	0	1	0	0	5	3	3	0	3	0.23	0.11	0.28	0.16	2
0	0	0	1	0	2	5	5	0	1	0.28	0.1	0.19	0.2	1
0	0	0	0	0	2	3	3	0	1	0.14	0.05	0.1	0.1	2
1	0	1	1	0	5	0	1	1	3	0.24	0.17	0.28	0.17	1
0	0	0	0	0	4	1	0	0	2	0.13	0.06	0.13	0.09	1
0	0	0	0	1	4	5	5	1	3	0.36	0.24	0.4	0.25	2
0	0	0	0	0	4	0	2	1	3	0.15	0.11	0.18	0.11	1
0	0	0	0	0	4	6	4	0	3	0.25	0.1	0.29	0.18	2
1	1	0	0	0	3	4	8	1	4	0.29	0.17	0.36	0.2	2
0	0	0	0	1	2	6	7	0	2	0.33	0.14	0.3	0.24	2
0	0	0	0	0	4	0	0	1	2	0.12	0.08	0.12	0.09	2
0	0	0	0	1	5	7	6	0	3	0.47	0.24	0.52	0.34	1
0	0	0	0	0	4	5	3	0	2	0.21	0.08	0.21	0.15	1
1	0	1	1	0	5	2	8	1	3	0.47	0.36	0.49	0.34	1
0	0	0	0	0	5	7	8	0	2	0.42	0.2	0.41	0.3	2
0	0	0	0	0	5	2	10	1	2	0.41	0.33	0.38	0.3	2
0	0	0	0	0	3	0	0	0	1	0.1	0.04	0.08	0.08	2
0	0	0	0	0	6	2	5	0	4	0.31	0.18	0.42	0.22	2
0	0	0	1	1	4	3	7	0	3	0.51	0.3	0.53	0.38	1
0	0	0	0	0	4	1	5	0	3	0.22	0.11	0.25	0.16	1
1	0	1	0	1	4	7	7	1	3	0.45	0.29	0.49	0.32	2
0	0	0	0	1	5	2	5	0	2	0.36	0.22	0.36	0.26	2
0	0	0	0	0	5	0	10	0	2	0.38	0.25	0.35	0.27	1
1	1	1	1	0	5	8	8	0	3	0.56	0.27	0.59	0.42	1
1	1	1	0	0	4	5	5	1	4	0.26	0.15	0.35	0.19	2
0	0	0	0	0	2	2	6	1	3	0.18	0.11	0.19	0.13	2
0	0	0	0	1	5	6	3	1	3	0.36	0.24	0.43	0.25	1
1	1	1	1	0	5	7	5	0	1	0.45	0.2	0.37	0.32	1
0	0	0	0	0	4	3	5	0	1	0.24	0.11	0.19	0.17	2
0	0	0	0	0	5	7	2	0	2	0.25	0.1	0.26	0.18	1
0	0	0	0	0	2	1	3	1	2	0.12	0.07	0.11	0.09	2
0	0	0	1	0	5	1	10	0	1	0.52	0.33	0.41	0.38	1
0	0	0	0	0	3	0	2	0	1	0.13	0.06	0.09	0.09	1
0	0	0	0	0	4	0	3	0	3	0.17	0.08	0.2	0.12	2
1	0	1	0	1	5	4	6	0	2	0.42	0.24	0.41	0.3	1
1	1	1	0	0	3	1	8	1	2	0.25	0.17	0.22	0.18	2
1	0	1	1	0	5	6	6	1	3	0.46	0.3	0.5	0.34	1
0	0	0	0	0	5	0	0	0	2	0.14	0.07	0.15	0.11	1
0	0	0	1	1	4	5	0	1	1	0.32	0.19	0.27	0.23	1
0	0	0	1	1	4	5	6	0	4	0.51	0.27	0.59	0.37	2
0	0	0	0	0	3	2	5	1	2	0.19	0.12	0.17	0.14	2
			1	0	5	0	5	0	3	0.35	0.2	0.37	0.25	2
0	0	0	0	0	4	4	3	0	4	0.2	0.08	0.29	0.15	2
0	0	0	0	1	4	0	5	0	4	0.29	0.17	0.38	0.21	1
0	0	0	0	0	5	0	5	0	2	0.24	0.14	0.23	0.17	1
0	0	0	0	0	5	0	4	0	4	0.22	0.12	0.31	0.16	2
1	0	1	0	0	5	2	5	1	3	0.27	0.19	0.31	0.19	1
1	1	1	0	1	4	0	10	0	3	0.44	0.3	0.45	0.32	1
0	0	0	0	0	2	5	5	0	2	0.19	0.07	0.17	0.14	2
0	0	0	0	0	4	0	4	0	2	0.19	0.1	0.18	0.14	2
0	0	0	1	0	6	0	0	0	3	0.25	0.14	0.31	0.18	2
1	1	0	0	1	5	4	9	1	3	0.52	0.42	0.56	0.38	1
1	0	1	0	0	2	8	8	1	3	0.29	0.14	0.3	0.21	2
1	1	1	0	0	5	0	7	0	3	0.3	0.18	0.33	0.21	1
0	0	0	0	0	5	7	5	1	2	0.33	0.19	0.33	0.23	2
1	1		0	0	5	0	2	1	3	0.18	0.14	0.22	0.13	2
0	0	0	0	0	4	7	8	0	1	0.37	0.16	0.29	0.27	2
0	0	0	0	0	4	3	3	0	2	0.19	0.08	0.19	0.14	1
0	0	0	0	0	6	2	1	0	2	0.21	0.11	0.22	0.15	1
			0	0	4	6	8	1	3	0.36	0.22	0.39	0.25	2
0	0	0	0	0	5	0	5	0	3	0.24	0.14	0.28	0.17	1
0	0	0	0	0	5	9	9	1	3	0.48	0.3	0.53	0.35	2
0	0	1	1	1	5	6	9	1	4	0.67	0.52	0.74	0.52	2
0	0	0	0	0	3	0	2	0	1	0.13	0.06	0.09	0.09	1
1	1	1	0	0	4	7	7	1	4	0.34	0.19	0.44	0.24	2
0	0	0	1	0	4	0	3	1	1	0.25	0.17	0.19	0.18	2
0	0	0	0	0	5	0	0	1	4	0.14	0.11	0.22	0.11	2
1	0	0	0	0	2	0	2	1	2	0.11	0.06	0.09	0.08	2
1	1	1	0	1	4	0	6	1	3	0.32	0.26	0.35	0.23	1
0	0	0	0	1	4	1	4	0	3	0.28	0.15	0.31	0.2	1
0	0	0	0	0	5	2	5	1	2	0.27	0.19	0.26	0.19	1
0	0	0	1	1	5	6	5	1	3	0.54	0.38	0.59	0.4	1
0	0	1	0	0	4	3	1	0	1	0.16	0.06	0.13	0.11	1
0	0		0	1	4	2	8	0	2	0.41	0.24	0.37	0.29	2
0	0	0	0	0	3	5	0	1	3	0.13	0.06	0.16	0.1	2
1	0	1	0	1	5	0	1	0	1	0.23	0.13	0.2	0.16	1
1	1	1	1	0	6	8	8	1	3	0.61	0.42	0.65	0.46	1
1	0	1	0	1	2	7	7	0	4	0.35	0.14	0.42	0.25	1
0	0	0	1	0	4	5	2	0	2	0.28	0.11	0.27	0.2	2
0	0	0	1	1	5	1	0	1	1	0.31	0.23	0.26	0.22	1
0	0	0	0	0	4	10	7	1	3	0.38	0.19	0.43	0.27	2
0	0	0	0	0	4	7	6	0	3	0.31	0.12	0.35	0.22	2
0	0	0	0	0	3	3	7	0	3	0.25	0.11	0.27	0.18	2
0	0	0	1	0	4	0	4	0	2	0.28	0.14	0.25	0.2	1
0	0	0	0	1	5	5	2	0	2	0.31	0.15	0.33	0.22	1
1	0	1	0	1	5	8	7	0	3	0.51	0.27	0.57	0.38	2
			0	0	5	5	5	1	3	0.3	0.19	0.35	0.22	2
0	0	0	0	0	4	0	2	0	1	0.15	0.07	0.12	0.11	2
1	0	1	1	0	5	7	5	1	2	0.45	0.27	0.43	0.32	1
0	0	0	0	1	5	9	9	1	2	0.59	0.42	0.58	0.45	2
1	1	1	0	1	6	8	10	1	3	0.66	0.52	0.7	0.51	1
0	0	0	0	0	4	0	0	1	2	0.12	0.08	0.12	0.09	2
0	0	0	0	0	5	8	0	0	2	0.21	0.07	0.23	0.15	2
0	0	0	0	1	3	5	6	1	3	0.34	0.21	0.37	0.24	2
0	0	1	0	0	2	8	9	0	4	0.32	0.11	0.38	0.23	2
1	1	1	0	0	4	5	2	0	3	0.19	0.07	0.23	0.14	2
1	0	1	1	1	4	7	7	0	2	0.57	0.3	0.53	0.43	2
			0	0	4	0	4	0	3	0.19	0.1	0.21	0.14	2
0	0	0	0	1	5	0	4	0	3	0.31	0.19	0.36	0.22	2
1	1	1	0	0	6	3	10	0	4	0.48	0.3	0.58	0.35	1
0	0	0	1	0	3	0	4	0	1	0.24	0.11	0.17	0.17	1
0	0	0	0	1	2	0	6	0	2	0.24	0.12	0.2	0.17	2
0	0	0	0	1	5	8	9	0	3	0.58	0.33	0.62	0.43	1
1	1	1	0	1	5	3	3	0	2	0.32	0.17	0.32	0.23	1
1	0	0	0	0	4	0	0	0	3	0.12	0.06	0.15	0.09	1
0	0	0	0	0	4	7	8	0	2	0.37	0.16	0.35	0.27	1
1	1	1	0	0	2	0	5	0	2	0.15	0.07	0.13	0.11	2
0	1	1	0	0	5	0	1	0	2	0.16	0.08	0.16	0.12	1
0	0	0	1	0	3	1	5	0	3	0.27	0.12	0.28	0.19	1
			0	0	2	0	0	0	3	0.08	0.03	0.1	0.06	2
			0	0	4	0	8	1	3	0.28	0.22	0.3	0.2	2
0	0	0	0	0	4	5	0	1	2	0.16	0.08	0.16	0.11	1
0	0	0	0	1	2	5	3	0	1	0.22	0.08	0.17	0.16	2
0	0	0	0	0	4	0	0	1	2	0.12	0.08	0.12	0.09	2
0	0	0	0	0	4	0	0	1	3	0.12	0.08	0.15	0.09	2
0	0	0	0	0	5	2	3	0	3	0.22	0.11	0.26	0.16	1
1	0	1	1	1	5	10	7	1	2	0.66	0.45	0.64	0.51	1
0	0	0	0	0	4	0	0	1	2	0.12	0.08	0.12	0.09	2
1	1	0	0	1	3	3	3	1	4	0.23	0.15	0.32	0.17	1
0	0	0	0	0	5	4	4	0	2	0.26	0.12	0.26	0.19	2
0	0	0	0	0	2	3	2	1	3	0.12	0.06	0.14	0.09	2
0	0	0	0	0	3	0	6	1	3	0.2	0.14	0.21	0.14	1
0	0	0	0	0	4	3	4	0	2	0.22	0.1	0.21	0.15	2
0	0	0	0	0	4	3	1	0	2	0.16	0.06	0.16	0.11	2
0	0	0	0		3	0	0	0	1					2
1	0	1	0	0	4	4	8	0	2	0.33	0.16	0.3	0.24	1
0	0	0	0	0	6	0	3	1	2	0.23	0.19	0.24	0.17	1
0	0	0	0	0	5	5	3	1	2	0.25	0.15	0.26	0.18	1
0	0	0	0	0	4	0	0	0	3	0.12	0.06	0.15	0.09	2
0	0	0	0	0	4	2	2	0	2	0.17	0.07	0.16	0.12	2
0	0	0	0	0	4	0	7	0	2	0.25	0.14	0.23	0.18	1
0	0	1	0	0	4	7	7	1	2	0.34	0.19	0.32	0.24	2
1	1	0		0	5	6	7	0	3					2
1	0	0	0	0	4	5	6	0	3	0.29	0.12	0.32	0.2	2
0	0	0	0	0	2	0	2	1	2	0.11	0.06	0.09	0.08	2
0	0	0	0	0	4	4	3	1	3	0.2	0.12	0.24	0.15	2
0	0	0	0	0	5	2	3	0	2	0.22	0.11	0.22	0.16	2
0	0	0	0	0	5	2	2	0	1	0.2	0.1	0.16	0.14	2
0	0	0	0	0	4	0	5	0	2	0.21	0.11	0.19	0.15	2
0	0	0	0	0	5	0	4	0	3	0.22	0.12	0.26	0.16	1
1	1	1	1	1	5	4	1	0	2	0.38	0.19	0.38	0.27	1
1	1	1	0	1	5	0	7	0	3	0.4	0.27	0.44	0.28	1
			0	0	4	4	7	0	4	0.3	0.14	0.39	0.22	2
0	0	0	0	0	2	0	5	0	3	0.15	0.07	0.16	0.11	2
0	0	1	1	0	5	8	1	1	1	0.34	0.17	0.29	0.24	1
0	0	0	0	0	4	9	10	1	1	0.46	0.27	0.37	0.34	2
1	0	1	0	0	5	9	10	1	2	0.51	0.33	0.49	0.38	2
1	1	1	0	0	5	5	8	1	4	0.39	0.27	0.49	0.28	2
0	0	0	0	0	4	0	7	0	3	0.25	0.14	0.28	0.18	2
0	0	1	0	0	4	0	0	0	3	0.12	0.06	0.15	0.09	1
1	0	0	0	1	4	0	6	1	2	0.32	0.26	0.3	0.23	2
0	0	0	0	0	2	8	5	1	1	0.22	0.09	0.16	0.16	2
1	0	0	0	1	4	6	4	0	2	0.34	0.15	0.33	0.24	2
0	0	0	0	0	5	3	5	1	4	0.28	0.19	0.38	0.2	2
0	0	1	0	1	5	6	10	1	3	0.58	0.45	0.62	0.44	2
1	0	1	0	1	4	10	7	0	3	0.49	0.22	0.54	0.36	2
0	0	0	0	0	6	0	0	0	2	0.17	0.09	0.19	0.12	2
0	0	0	0	0	2	5	6	0	4	0.21	0.07	0.27	0.15	1
			0	0	3	0	0	0	1	0.1	0.04	0.08	0.08	2
0	0	0	0	0	5	3	6	0	2	0.31	0.16	0.3	0.22	1
0	0	0	0	0	5	1	4	0	2	0.23	0.12	0.23	0.17	2
1	1	0	0	0	2	0	0	0	4	0.08	0.03	0.12	0.06	2
0	0	0	0	1	4	0	2	0	1	0.22	0.12	0.17	0.16	1
0	0	0	0	0	2	1	5	1	3	0.16	0.09	0.16	0.11	2
0	0	0	0	0	3	0	3	0	4	0.14	0.07	0.19	0.1	2
1	1	0	0	0	3	7	7		3	0.3		0.32	0.21	2
			0	0	4	3	3	1	2	0.19	0.12	0.19	0.14	2
1	0	0	0	0	5	4	7	1	2	0.35	0.24	0.33	0.25	1
1	0	1	0	0	5	0	9	0	1	0.35	0.22	0.27	0.25	2
0	0	0	0	0	5	8	3	1	1	0.29	0.15	0.25	0.2	1
0	0	0	0	0	4	1	5	0	2	0.22	0.11	0.2	0.16	2
0	0	0	0	0	5	0	0	0	1	0.14	0.07	0.12	0.11	2
0	0	0	0	0	4	0	1	0	1	0.13	0.06	0.11	0.1	2
0	0	0	0	0	2	0	6	0	3	0.17	0.07	0.17	0.12	2
0	0	0	1	0	4	1	7	0	2	0.37	0.2	0.33	0.27	2
0	0	0	0	0	3	1	0	0	1	0.11	0.04	0.08	0.08	2
0	0	0	0	0	3	0	5	0	1	0.18	0.08	0.13	0.13	2
0	0	0	0	0	5	0	1	0	3	0.16	0.08	0.2	0.12	1
0	0	0	0	0	5	1	5	0	2	0.26	0.14	0.25	0.18	1
0	0	0	1	1	5	8	6	1	2	0.6	0.42	0.59	0.46	1
0	0	0	0	0	5	1	9	0	2	0.37	0.22	0.34	0.26	2
1	1		0	1	4	4	4	0	3	0.31	0.15	0.36	0.22	2
1	1	1	1	0	5	5	5	1	3	0.42	0.27	0.46	0.3	1
0	0	1	0	1	3	5	0	0	2	0.19	0.07	0.19	0.14	2
0	0	0	0	1	5	6	2	1	2	0.33	0.21	0.34	0.23	1
0	0	0	0	0	4	6	5	0	3	0.27	0.11	0.31	0.19	1
1	1	1	0	1	6	8	10	1	3	0.66	0.52	0.7	0.51	1
1	1	0	0	0	5	6	5	1	4	0.32	0.19	0.43	0.22	2
0	0	0	0	0	2	2	8	1	2	0.22	0.14	0.19	0.16	2
0	1	0	0	0	4	0	8	0	3	0.28	0.16	0.3	0.2	1
0	0	0	0	0	3	4	5	0	3	0.21	0.08	0.24	0.15	2
0	0	0	0	0	5	0	5	1	2	0.24	0.19	0.23	0.17	1
0	0	0	0	1	6	7	8	0	1	0.58	0.36	0.52	0.44	2
0	0	0	0	0	2	0	0	1	2	0.08	0.05	0.08	0.06	2
0	0	0	0	0	1	2	1	1	1	0.09	0.04	0.06	0.07	2
0	0	0	0	0	4	0	3	0	3	0.17	0.08	0.2	0.12	1
1	1	1	0	1	4	2	9	0	3	0.44	0.27	0.46	0.32	1
0	0	0	0	0	2	1	5	0	3	0.16	0.07	0.16	0.11	2
1	0	1	0	0	4	1	2	1	2	0.16	0.11	0.15	0.12	1
0	0	1	0	0	2	1	1	1	2	0.1	0.06	0.09	0.07	2
0	0	0	0	0	4	5	5	1	2	0.26	0.15	0.25	0.19	2
1	0	1	1	0	4	0	5	0	3	0.3	0.16	0.32	0.21	2
0	1	1	0	0	3	0	1	0	1	0.11	0.05	0.09	0.08	1
0	0	0	0	1	6	0	0	1	4	0.24	0.21	0.37	0.17	1
			1	0	4	6	6	0	4	0.41	0.18	0.5	0.3	2
0	0	0	0	1	4	0	5	0	2	0.29	0.17	0.27	0.21	2
0	0	0	0	0	4	7	7	0	3	0.34	0.14	0.38	0.24	2
1	0	0	1	0	4	7	7	1	2	0.46	0.27	0.42	0.33	1
0	0	0	0	0	5	0	6	1	3	0.27	0.22	0.3	0.19	2
0	0	0	0	0	2	0	5	0	2	0.15	0.07	0.13	0.11	2
0	0	0	0	0	6	0	0	0	2	0.17	0.09	0.19	0.12	2
0	0	0	0	0	4	0	2	0	3	0.15	0.07	0.18	0.11	1
0	0	0	0	0	3	5	2	0	2	0.16	0.06	0.16	0.12	1
0	0	0	0	0	4	1	1	0	3	0.14	0.06	0.17	0.1	2
0	0	0	0	0	3	5	7	0	3	0.27	0.11	0.29	0.19	2
1	1	1	0	1	6	2	5	0	3	0.41	0.27	0.48	0.3	2
0	0	0	0	0	5	0	1	0	3	0.16	0.08	0.2	0.12	2
0	0	0	0	0	5	5	1	0	3	0.21	0.08	0.26	0.15	2
1	0	1	0	0	5	0	0	0	1	0.14	0.07	0.12	0.11	1
0	0	0	0	0	4	0	3	1	3	0.17	0.12	0.2	0.12	1
1	0	1	0	0	5	7	3	1	3	0.27	0.15	0.33	0.2	1
0	0	0	0	0	4	2	5	0	1	0.23	0.11	0.18	0.16	1
0	0	0	0	0	4	4	4	0	3	0.23	0.1	0.26	0.16	2
0	0	0	0	1	3	0	5	0	2	0.25	0.14	0.23	0.18	2
0	0	1	0	0	5	2	3	0	1	0.22	0.11	0.18	0.16	2
0	0	0	1	0	4	7	5	0	1	0.4	0.16	0.31	0.28	1
0	0	0	0	1	4	0	0	0	3	0.18	0.09	0.22	0.13	2
0	0	0	0	1	1	0	0	0	2	0.1	0.04	0.09	0.08	1
0	0	0	0	0	5	0	7	1	2	0.3	0.24	0.28	0.21	2
0	0	0	0	0	5	0	7	0	3	0.3	0.18	0.33	0.21	2
1	1	0	0	0	4	6	5	0	3	0.27	0.11	0.31	0.19	2
0	0	0	0	0	5	2	2	0	2	0.2	0.1	0.2	0.14	1
0	0	0	0	0	2	0	0	0	2	0.08	0.03	0.08	0.06	2
0	0	0	0	0	5	2	6	0	1	0.29	0.16	0.23	0.21	1
0	0	0	0	0	4	0	8	0	2	0.28	0.16	0.25	0.2	2
1	1	1	0	1	3	3	5	0	3	0.28	0.14	0.31	0.2	1
0	0	0	0	1	2	0	0	0	3	0.12	0.06	0.14	0.09	2
0	0	0	0	0	3	7	5	1	2	0.24	0.12	0.23	0.17	2
1	0	1	0	0	4	0	3	1	3	0.17	0.12	0.2	0.12	2
0	0	0	0	0	4	5	10	0	4	0.4	0.2	0.49	0.29	1
0	0	0	0	0	5	2	4	0	3	0.24	0.12	0.29	0.17	2
0	0	0	0	0	5	7	9	1	3	0.45	0.3	0.49	0.33	2
0	0	0	1	0	4	0	4	0	3	0.28	0.14	0.29	0.2	2
0	0	0	0	0	4	1	6	0	2	0.24	0.12	0.22	0.17	2
0	0	0	0	1	5	0	7	1	3	0.4	0.35	0.44	0.28	1
1	1	1	1	0	5	0	3	0	2	0.29	0.16	0.27	0.21	1
0	0	0	0	0	2	0	0	0	2	0.08	0.03	0.08	0.06	2
			0	1	5	6	6	0	1	0.45	0.24	0.39	0.33	2
0	0	1	0	1	5	7	4	1	4	0.4	0.26	0.53	0.29	1
1	0	1	0	1	5	7	9	0	3	0.56	0.33	0.61	0.42	1
0	0	0	0		4	3	5	1	2					2
1	1	1	0	1	4	5	4	1	2	0.33	0.21	0.32	0.23	2
0	0	0	0	1	4	0	3	0	2	0.24	0.14	0.23	0.17	1
0	0	0	0	0	3	0	3	0	2	0.14	0.07	0.13	0.1	2
0	0	0	0	0	4	0	0	1	1	0.12	0.08	0.1	0.09	2
1	1	1	1	0	5	8	8	1	3	0.56	0.36	0.59	0.42	1
0	0	0	0	0	4	1	7	0	1	0.27	0.14	0.2	0.19	2
0	0	1	0	1	5	6	5	0	1	0.42	0.22	0.36	0.3	1
1	0	0	0	0	4	3	6	1	2	0.26	0.17	0.25	0.19	2
0	0	0	0	1	5	7	3	0	1	0.37	0.17	0.33	0.26	2
			0	0	4	5	6	1	2	0.29	0.17	0.27	0.2	2
0	0	0	0	1	5	8	8	0	3	0.55	0.3	0.6	0.4	2
0	0	0	0	0	4	1	1	1	2	0.14	0.09	0.14	0.1	2
0	0	0	0	0	4	2	5	0	2	0.23	0.11	0.21	0.16	1
0	0	0	1	0	3	2	4	0	1	0.26	0.11	0.18	0.18	2
1	0	1	1	0	5	3	2	1	3	0.3	0.19	0.34	0.21	1
0	0	0	0	0	5	8	5	1	4	0.34	0.19	0.46	0.24	2
0	0	0	1	0	2	0	0	0	1	0.13	0.05	0.09	0.1	2
			0	0	4	0	5	0	2	0.21	0.11	0.19	0.15	2
0	0	0	0	0	2	5	6	0	2	0.21	0.07	0.18	0.15	2
0	0	0	0	0	5	9	5	0	3	0.36	0.14	0.42	0.25	2
1	0	0	0	1	3	0	4	1	3	0.23	0.17	0.25	0.16	2
0	0	0	0	0	4	4	6	0	4	0.28	0.12	0.36	0.2	2
0	0	0	0	0	3	4	4	0	2	0.19	0.07	0.18	0.14	2
1	1	1	0	0	5	5	4	1	3	0.28	0.17	0.33	0.2	1
0	0	0	0	0	5	7	7	0	2	0.39	0.18	0.38	0.28	2
1	1	1	0	1	2	5	10	0	3	0.41	0.2	0.41	0.3	2
0	0	0	0	1	4	1	2	0	3	0.23	0.12	0.27	0.16	1
0	0	0	0	0	3	1	1	0	3	0.12	0.05	0.14	0.09	2
0	0	0	1	0	4	0	10	0	1	0.45	0.27	0.33	0.33	1
0	0	0	0	0	4	5	5		1	0.26		0.21	0.19	2
0	0	0	0	0	5	0	5	0	2	0.24	0.14	0.23	0.17	1
1	0	0	0	0	2	0	3	1	2	0.12	0.07	0.1	0.09	2
1	0	1	0	0	4	5	8	1	3	0.34	0.22	0.37	0.25	2
0	0	0	0	0	4	0	0	0	3	0.12	0.06	0.15	0.09	2
0	0	0	0	0	5	0	5	0	1	0.24	0.14	0.19	0.17	1
			0	0	4	0	6	0	3	0.23	0.12	0.25	0.16	2
1	1	1	0	0	3	1	4	0	3	0.17	0.07	0.18	0.12	2
0	0	0	0	0	4	8	8	0	2	0.39	0.16	0.36	0.28	2
1	0	0	0	0	5	3	3	0	2	0.23	0.11	0.23	0.16	1
0	0	0	0	0	5	4	5	1	3	0.29	0.19	0.34	0.21	1
1	0	0	0	0	6	7	5	0	2	0.38	0.18	0.39	0.27	1
1	0	1	0	1	5	3	7	0	4	0.44	0.27	0.55	0.32	1
0	0	0	0	0	4	1	0	0	3	0.13	0.06	0.16	0.09	1
1	1	0	1	0	4	0	2	1	2	0.23	0.15	0.21	0.16	1
1	1	1	0	1	4	1	1	1	2	0.2	0.15	0.2	0.15	2
0	0	0	0	0	5	8	0	0	3	0.21	0.07	0.28	0.15	1
0	0	0	1	0	4	7	10	1	4	0.56	0.36	0.62	0.42	1
0	0	0	0	0	2	2	2	0	3	0.12	0.04	0.13	0.09	2
0	0	0	0	1	4	5	3	1	4	0.3	0.19	0.41	0.21	1
1	0	0	0	0	4	7	6	0	3	0.31	0.12	0.35	0.22	2
0	0	0	1	1	5	0	5	1	2	0.45	0.38	0.43	0.33	1
1	1	0	0	0	6	3	10	0	2	0.48	0.3	0.46	0.35	2
0	0	0	0	0	4	8	5	1	3	0.3	0.15	0.34	0.21	2
0	0	0	0	0	5	8	5	0	1	0.34	0.14	0.29	0.24	2
0	0	0	0	1	3	0	0	0	1	0.15	0.07	0.12	0.11	2
0	0	0	0	0	1	0	3	0	2	0.1	0.04	0.08	0.07	2
0	0	0	0	0	4	7	8	0	2	0.37	0.16	0.35	0.27	1
			0	0	5	4	7	0	4	0.35	0.18	0.45	0.25	2
0	1	1	0	0	5	2	9	0	4	0.38	0.22	0.47	0.27	1
1	1	1	1	0	5	4	8	0	4	0.5	0.27	0.58	0.37	1
0	0	0	0	1	5	10	5	0	2	0.48	0.22	0.49	0.35	2
0	0	1	0	1	4	4	4	1	2	0.31	0.21	0.31	0.22	1
0	0	0	0	0	2	0	5	0	2	0.15	0.07	0.13	0.11	1
1	1	1	0	0	4	6	9	0	2	0.39	0.18	0.36	0.28	1
0	0	1	0	0	4	6	10	0	4	0.42	0.2	0.5	0.3	1
0	0	0	0	0	4	5	2	1	2	0.19	0.11	0.19	0.14	1
0	0	0	0	0	5	0	2	0	2	0.18	0.1	0.18	0.13	1
1	1	1	1	0	5	7	8	1	2	0.54	0.36	0.51	0.4	1
0	0	1	0	0	4	2	3	0	4	0.19	0.08	0.26	0.13	1
0	0	0	0	1	5	8	8	0	4	0.55	0.3	0.65	0.4	1
0	0	1	0	0	5	2	7	0	3	0.32	0.18	0.36	0.23	2
0	0	0		0	3	0	5	1	4					2
0	0	0	1	1	4	2	4	1	4	0.4	0.29	0.49	0.29	2
0	0	0	0	0	5	0	8	1	3	0.32	0.27	0.35	0.23	1
0	0	0	0	0	2	7	7	1	2	0.25	0.12	0.22	0.18	2
0	0	0	0	0	4	0	0	0	3	0.12	0.06	0.15	0.09	2
1	1	1	0	0	4	5	8	1	4	0.34	0.22	0.43	0.25	2
0	0	0	0	0	2	1	4	1	2	0.14	0.08	0.12	0.1	2
0	0	0	1	0	4	3	4	0	2	0.31	0.14	0.29	0.22	2
0	0	0	0	1	4	0	2	0	2	0.22	0.12	0.21	0.16	1
1	1	1	0	1	3	0	5	0	2	0.25	0.14	0.23	0.18	2
0	0	0	0	1	5	5	9	1	5	0.53	0.42	0.69	0.39	1
0	0	0	0	0	4	0	2	1	2	0.15	0.11	0.15	0.11	2
0	0	0	0	0	2	2	2	1	3	0.12	0.06	0.13	0.09	2
1	0	0	0	1	2	2	5	0	2	0.23	0.11	0.21	0.17	2
1	0	1	0	0	5	9	5	0	2	0.36	0.14	0.36	0.25	1
0	0	0	1	0	4	0	2	1	2	0.23	0.15	0.21	0.16	1
0	0	0	0	1	5	0	2	1	2	0.25	0.21	0.26	0.18	2
0	0	0	0	0	5	0	2	0	1	0.18	0.1	0.15	0.13	1
			0	0	5	6	2	0	3	0.24	0.1	0.3	0.17	2
1	1	1	0	0	3	0	0	1	2	0.1	0.06	0.1	0.08	2
0	0	0	1	0	4	8	3	0	1	0.35	0.12	0.28	0.25	1
0	0	0	0	0	3	0	4	1	2	0.16	0.11	0.14	0.12	2
0	0	0	0	0	5	0	0	0	1	0.14	0.07	0.12	0.11	1
0	0	0	1	0	5	0	5	0	3	0.35	0.2	0.37	0.25	1
0	0	0	0	0	5	5	3	0	2	0.25	0.11	0.26	0.18	1
0	0	0	0	0	3	6	7	1	2	0.28	0.15	0.26	0.2	2
1	1	0	0	0	5	5	5	1	3	0.3	0.19	0.35	0.22	1
0	0	0	0	0	5	0	1	0	4	0.16	0.08	0.24	0.12	1
1	0	1	0	0	4	7	7	1	3	0.34	0.19	0.38	0.24	1
0	0	0	1	1	4	10	0	0	4	0.39	0.13	0.51	0.28	2
0	0	0	1	0	3	3	4	0	3	0.27	0.11	0.28	0.19	1
0	0	0	0	0	1	0	4	0	2	0.11	0.04	0.09	0.08	2
0	0	0	0	0	4	0	0	0	3	0.12	0.06	0.15	0.09	2
1	0	1	0	1	4	0	4	0	2	0.26	0.15	0.25	0.19	1
0	0	0	0	0	3	1	3	0	2	0.15	0.07	0.14	0.11	2
1	1	1	0	1	4	4	7	0	3	0.4	0.22	0.44	0.29	2
0	0	0	0	0	3	3	6	0	2	0.23	0.1	0.2	0.16	2
1	1	1	0	1	5	3	5	0	4	0.38	0.22	0.49	0.27	1
0	0	0	0	0	4	5	4	0	2	0.24	0.1	0.23	0.17	2
0	0	0	0	0	4	5	6	0	4	0.29	0.12	0.38	0.2	2
1	1	1	1	1	5	7	9	1	1	0.68	0.52	0.59	0.53	1
0	0	0	0	0	5	1	6	1	2	0.28	0.22	0.27	0.2	1
0	0	0	0	0	4	0	0	0	1	0.12	0.06	0.1	0.09	1
0	0	0	0	0	3	0	0	1	5	0.1	0.06	0.18	0.08	2
			0	1	4	5	2	1	1	0.27	0.17	0.23	0.19	2
0	0	0	0	0	4	3	3	1	2	0.19	0.12	0.19	0.14	2
0	0	0	0	0	2	1	4	1	3	0.14	0.08	0.15	0.1	2
0	0	1	0	0	4	5	7	1	3	0.31	0.19	0.35	0.22	2
0	0	0	0	0	5	0	0	0	1	0.14	0.07	0.12	0.11	1
1	1	1	1	0	5	6	5	0	3	0.43	0.2	0.47	0.31	2
0	0	0	0	1	4	4	5	0	2	0.34	0.17	0.33	0.24	1
0	0	0	0	1	4	1	5	1	2	0.3	0.24	0.29	0.22	1
			0	0	3	0	6	0	1	0.2	0.1	0.14	0.14	2
1	1	1	0	1	5	7	8	0	3	0.53	0.3	0.58	0.39	1
1	1	0	0	0	5	0	3	0	1	0.2	0.11	0.16	0.14	2
1	1	1	0	0	4	6	9	0	3	0.39	0.18	0.41	0.28	1
1	1	1	0	0	4	6	3	0	3	0.22	0.08	0.27	0.16	2
1	1	0	0	0	5	0	5	0	2	0.24	0.14	0.23	0.17	2
1	1	1	0	0	5	1	3	1	2	0.21	0.15	0.21	0.15	1
0	0	0	0	1	5	7	3	0	2	0.37	0.17	0.38	0.26	1
0	0	0	0	0	4	6	5	0	2	0.27	0.11	0.26	0.19	1
0	0	0	0	0	4	0	5	0	3	0.21	0.11	0.23	0.15	1
0	0	0	0	0	6	10	8	0	5	0.52	0.25	0.69	0.38	2
0	0	0	0	1	2	1	10	0	2	0.36	0.2	0.3	0.25	2
1	0	0	0	0	5	1	0	0	2	0.15	0.07	0.16	0.11	1
0	0	1	0	1	5	2	6	0	4	0.39	0.24	0.5	0.28	1
0	0	0	0	0	4	0	1	0	2	0.13	0.06	0.13	0.1	2
0	0	0	0	1	3	3	5	1	4	0.28	0.19	0.37	0.2	2
1	0	0	0	0	2	5	7	0	2	0.23	0.09	0.2	0.17	2
0	0	0	0	0	5	4	10	0	2	0.44	0.25	0.41	0.32	2
0	0	0	0	0	3	0	5	1	1	0.18	0.12	0.13	0.13	2
0	0	0	0	0	4	2	2	0	5	0.17	0.07	0.29	0.12	1
0	0	0	0	0	3	0	3	0	3	0.14	0.07	0.16	0.1	2
0	0	0	0	0	3	10	10	0	2	0.43	0.16	0.39	0.31	2
			0	0	4	0	1	0	2	0.13	0.06	0.13	0.1	2
0	0	0	0	0	5	4	0	0	2	0.18	0.07	0.19	0.13	2
			0	0	4	3	4	0	2	0.22	0.1	0.21	0.15	2
0	0	0	0	0	5	0	9	0	3	0.35	0.22	0.38	0.25	1
0	0	0	0	0	5	5	1	1	3	0.21	0.12	0.26	0.15	2
1	0	0	0	1	4	6	7	0	2	0.43	0.22	0.41	0.31	2
0	0	0	0	0	4	0	7	0	3	0.25	0.14	0.28	0.18	2
1	1	1	1	0	5	2	5	0	1	0.37	0.2	0.3	0.27	2
0	0	0	0	0	4	4	5	1	4	0.25	0.15	0.34	0.18	2
0	0	0	0	0	4	7	7	0	3	0.34	0.14	0.38	0.24	2
0	0	0	0	0	5	0	2	0	2	0.18	0.1	0.18	0.13	1
1	0	1	1	0	5	0	4	1	3	0.32	0.24	0.35	0.23	1
0	0	0	0	0	5	0	2	0	2	0.18	0.1	0.18	0.13	2
		0	0	1	3	0	2	0	3	0.18	0.09	0.21	0.13	2
0	0	0	0	1	6	6	8	1	3	0.57	0.45	0.62	0.42	2
0	0	0	0	0	4	1	1	1	2	0.14	0.09	0.14	0.1	2
0	0	0	0	0	2	1	3	0	4	0.12	0.05	0.17	0.09	2
0	0	0	0	0	5	0	7	1	2	0.3	0.24	0.28	0.21	1
0	0	0	0	0	6	6	5	1	3	0.36	0.24	0.43	0.26	2
1	1	1	0	1	4	3	4	0	3	0.3	0.15	0.34	0.21	1
0	0	0	0	0	5	0	7	1	2	0.3	0.24	0.28	0.21	1
0	0	1	0	0	5	0	8	1	3	0.32	0.27	0.35	0.23	1
0	0	0	0	1	6	5	0	1	3	0.3	0.21	0.39	0.22	1
1	1	1	0	1	6	2	5	1	3	0.41	0.35	0.48	0.3	1
0	0	0	1	0	3	10	6	0	1	0.42	0.14	0.33	0.3	1
0	0	0	0	1	5	0	6	0	1	0.36	0.24	0.3	0.26	2
0	0	0	0	1	5	8	5	1	2	0.45	0.29	0.45	0.32	1
0	0	0	0	0	3	5	1	1	3	0.15	0.07	0.18	0.11	2
0	0	1	0	0	5	3	5	1	3	0.28	0.19	0.32	0.2	1
0	0	0	0	0	3	7	7	0	3	0.3	0.11	0.32	0.21	2
0	0	0	0	0	4	8	8	1	4	0.39	0.22	0.48	0.28	2
0	0	0	1	0	2	0	3	0	3	0.18	0.07	0.18	0.13	2
0	0	0	0	0	4	3	2	1	2	0.18	0.11	0.17	0.13	1
0	0	0	0	0	3	2	3	0	2	0.16	0.07	0.14	0.11	1
1	1	1	1	0	5	7	8	1	3	0.54	0.36	0.57	0.4	1
1	1	1	0	0	4	0	1	1	3	0.13	0.09	0.16	0.1	1
1	0	0	0	0	5	3	6	0	1	0.31	0.16	0.25	0.22	2
1	1	1	1	0	4	8	5	0	5	0.41	0.16	0.57	0.29	2
0	0	0	0	0	4	0	1	0	2	0.13	0.06	0.13	0.1	1
0	0	0	0	0	4	3	1	0	3	0.16	0.06	0.19	0.11	1
1	0	0	0	0	4	3	4	0	3	0.22	0.1	0.25	0.15	2
0	0	0	0	0	4	2	0	0	2	0.13	0.06	0.14	0.1	1
1	1	1	0	0	4	2	6	1	3	0.25	0.17	0.28	0.18	2
0	0	0	0	1	5	0	1	1	2	0.23	0.19	0.24	0.16	1
1	1	1	1	1	5	0	0	1	2	0.3	0.23	0.3	0.21	1
0	0	0	1	0	3	6	5	1	2	0.33	0.17	0.3	0.24	2
0	0	0	1	0	6	0	5	1	2	0.4	0.32	0.38	0.28	1
0	0	0	0	0	3	3	2	0	2	0.15	0.06	0.14	0.11	2
1	0	1	0	1	5	5	8	0	3	0.5	0.3	0.55	0.37	2
0	0	0	1	0	4	6	8	1	1	0.48	0.3	0.37	0.35	2
0	0	0	0	0	2	3	10	0	3	0.29	0.12	0.28	0.2	2
0	0	0	0	0	4	0	10	0	2	0.34	0.2	0.29	0.24	1
1	0	1	1	1	4	8	9	1	3	0.65	0.45	0.66	0.5	1
0	0	0	0	0	2	3	2	1	2	0.12	0.06	0.11	0.09	2
0	0	0	0	0	3	1	0	0	2	0.11	0.04	0.1	0.08	1
0	0	0	0	0	5	3	5	1	1	0.28	0.19	0.23	0.2	1
0	0	0	0	1	4	6	7	0	3	0.43	0.22	0.47	0.31	1
			0	0	5	7	8	1	3	0.42	0.27	0.47	0.3	2
1	0	1	0	0	4	8	3	0	3	0.25	0.08	0.29	0.18	1
0	0	0	0	0	4	0	1	1	3	0.13	0.09	0.16	0.1	1
0	0	1	0	0	2	0	7	0	3	0.18	0.09	0.19	0.13	2
1	0	1	0	1	5	0	7	1	3	0.4	0.35	0.44	0.28	1
0	0	0	1	0	5	0	1	1	1	0.24	0.17	0.19	0.17	1
1	1	1	0	0	4	5	5	0	2	0.26	0.11	0.25	0.19	1
			0	1	4	6	8	1	2	0.46	0.32	0.44	0.34	2
1	0	1	0	0	5	0	3	0	2	0.2	0.11	0.2	0.14	1
0	0	0	0	0	4	0	0	1	3	0.12	0.08	0.15	0.09	1
0	0	0	0	1	5	5	1	0	1	0.29	0.13	0.25	0.2	1
0	0	0	0	0	4	3	0	0	3	0.14	0.06	0.18	0.1	1
1	0	0	0	1	4	6	5	0	3	0.37	0.17	0.42	0.26	2
1	0	0	0	0	5		8	0	2		0.2			2
0	0	1	0	0	6	5	10	1	3	0.51	0.39	0.55	0.37	2
0	0	0	0	0	4	1	7	0	1	0.27	0.14	0.2	0.19	1
0	0	0	1	0	3	6	8	1	4	0.43	0.24	0.49	0.31	1
			0	0	5	3	4	0	2	0.25	0.12	0.25	0.18	2
0	0	0	0	0	4	10	5	0	2	0.32	0.11	0.32	0.23	1
0	0	0	0	0	4	0	1	1	2	0.13	0.09	0.13	0.1	1
0	0	0	1	0	5	0	4	0	3	0.32	0.18	0.35	0.23	1
0	0	0	0	1	2	3	10	1	2	0.38	0.27	0.32	0.27	2
0	0	0	0	0	5	0	1	1	3	0.16	0.12	0.2	0.12	1
1	0	1	0	0	5	7	2	0	3	0.25	0.1	0.31	0.18	1
0	0	0	0	1	5	0	6	0	2	0.36	0.24	0.35	0.26	1
0	0	0	0	1	6	5	2	1	1	0.36	0.26	0.33	0.26	2
0	0	0	0	0	6	0	3	1	1	0.23	0.19	0.2	0.17	2
			0	0	5	6	3	0	2	0.26	0.11	0.27	0.19	2
0	0	0	1	0	5	5	8	0	1	0.51	0.27	0.42	0.38	2
0	0	0	0	0	2	3	0	0	2	0.1	0.03	0.09	0.07	2
1	0	1	0	0	5	0	9	1	2	0.35	0.3	0.32	0.25	2
0	0	0	0	0	4	0	0	0	3	0.12	0.06	0.15	0.09	1
0	0	0	1	0	3	0	1	0	3	0.17	0.07	0.19	0.13	1
1	0	1	0	0	5	1	5	0	2	0.26	0.14	0.25	0.18	2
0	0	0	0	0	3	0	2	0	1	0.13	0.06	0.09	0.09	2
0	0	0	0	0	5	0	0	0	1	0.14	0.07	0.12	0.11	2
0	0	0	1	1	4	1	6	1	2	0.45	0.35	0.41	0.32	2
1	1	0	1	0	4	5	7	1	3	0.43	0.27	0.45	0.31	1
0	0	0	0	1	2	8	9	1	4	0.42	0.24	0.5	0.3	2
0	0	0	0	0	4	6	4	1	3	0.25	0.14	0.29	0.18	2
0	0	0	0	0	5	0	5	0	2	0.24	0.14	0.23	0.17	2
0	0	0	0	0	5	3	3	0	4	0.23	0.11	0.33	0.16	2
0	0	0	1	0	4	3	3	0	2	0.28	0.12	0.26	0.2	2
1	1	1	1	0	4	3	5	0	3	0.34	0.16	0.36	0.24	1
1	1	1	0	0	3	4	3	0	2	0.17	0.07	0.16	0.13	2
0	0	0	0	1	4	6	6	0	1	0.4	0.19	0.33	0.29	2
0	0	0	0	0	5	1	8	1	3	0.34	0.27	0.37	0.24	2
0	0	0	0	0	4	4	6	0	2	0.28	0.12	0.26	0.2	2
0	0	0	0	0	4	7	5	0	2	0.29	0.11	0.28	0.2	2
			0	1	5	8	7	0	3	0.51	0.27	0.57	0.38	2
0	0	0	0	0	5	5	8	1	2	0.39	0.27	0.37	0.28	2
0	0	0	0	1	4	0	2	0	2	0.22	0.12	0.21	0.16	2
0	0	0	0	0	3	6	7	1	2	0.28	0.15	0.26	0.2	2
0	0	0	0	0	4	0	1	1	3	0.13	0.09	0.16	0.1	2
0	0	0	0	0	2	0	0	1	3	0.08	0.05	0.1	0.06	2
0	0	0	0	0	2	1	10	1	2	0.26	0.18	0.21	0.19	2
0	0	0	0	0	5	1	1	0	1	0.17	0.08	0.14	0.12	2
0	0	0	0	0	2	5	6	1	3	0.21	0.11	0.22	0.15	2
0	0	0	0	1	4	0	1	0	4	0.2	0.11	0.28	0.14	1
0	0	0	0	0	4	0	4	0	1	0.19	0.1	0.14	0.14	1
0	0	0	0	0	4	1	3	1	3	0.18	0.12	0.21	0.13	1
		0	0	0	3	0	0	1	3	0.1	0.06	0.12	0.08	2
1	0	0	1	0	4	5	9	0	4	0.5	0.25	0.56	0.36	2
0	0	0	0	1	5	0	7	1	3	0.4	0.35	0.44	0.28	1
0	0	0	1	0	6	0	10	1	1	0.56	0.49	0.45	0.41	1
0	0	0	0	0	5	7	9	1	3	0.45	0.3	0.49	0.33	1
0	1	1	0	0	4	1	5	0	3	0.22	0.11	0.25	0.16	1
1	1	1	0	0	3	1	2	0	4	0.13	0.06	0.19	0.1	1
0	0	0	0	1	5	1	5	1	3	0.35	0.29	0.4	0.25	2
0	0	1	0	0	4	0	1	0	2	0.13	0.06	0.13	0.1	2
0	0	0	0	0	4	1	4	0	2	0.2	0.1	0.19	0.14	1
0	0	0	0	0	3	0	5	1	2	0.18	0.12	0.16	0.13	2
1	1	0	0	0	4	1	5	1	1	0.22	0.15	0.17	0.16	2
0	0	1	0	1	5	5	8	1	2	0.5	0.38	0.49	0.37	1
0	0	0	0	0	1	0	4	0	2	0.11	0.04	0.09	0.08	2
0	0	0	0	1	3	6	0	0	2	0.2	0.07	0.2	0.14	2
0	0	0	0	1	4	0	6	1	2	0.32	0.26	0.3	0.23	1
1	0	1	0	0	5	0	3	0	2	0.2	0.11	0.2	0.14	1
0	0	0	1	0	5	0	6	1	4	0.38	0.3	0.46	0.27	2
0	0	0	0	0	4	7	3	0	3	0.23	0.08	0.28	0.17	2
0	0	0	0	0	2	1	3	1	3	0.12	0.07	0.14	0.09	2
0	0	0	0	0	4	4	7	0	3	0.3	0.14	0.33	0.22	2
0	0	0	0	1	4	4	7	1	4	0.4	0.29	0.5	0.29	2
0	0	0	0	0	4	2	0	1	3	0.13	0.08	0.17	0.1	2
0	0	0	0	1	4	0	5	1	4	0.29	0.24	0.38	0.21	2
0	0	0	1	0	4	3	7	1	4	0.4	0.27	0.48	0.29	1
0	0	0	0	1	4	1	3	1	3	0.25	0.19	0.29	0.18	2
0	0	0	0	0	3	9	3	0	4	0.22	0.07	0.31	0.16	2
1	0	0	0	0	4	0	7	1	2	0.25	0.19	0.23	0.18	2
0	0	0	1	0	4	0	0	0	2	0.18	0.08	0.17	0.13	1
0	0	0	0	0	5	5	3	0	3	0.25	0.11	0.31	0.18	1
0	0	0	0	0	4	0	2	1	3	0.15	0.11	0.18	0.11	2
0	0	0	0	0	4	3	2	0	2	0.18	0.07	0.17	0.13	1
0	0	0	1	0	5	0	3	1	1	0.29	0.22	0.23	0.21	2
0	0	0	0	0	2	0	5	1	2	0.15	0.09	0.13	0.11	2
1	1	1	1	0	4	5	8	1	3	0.46	0.3	0.48	0.34	1
1	0	1	0	0	4	0	4	0	2	0.19	0.1	0.18	0.14	1
0	0	0	0	0	2	3	3	0	2	0.14	0.05	0.12	0.1	2
0	0	0	0	0	3	8	6	0	2	0.28	0.1	0.26	0.2	1
1	1	1	0	0	3	3	9	0	1	0.3	0.14	0.22	0.21	2
0	0	0	0	0	3	4	5	0	3	0.21	0.08	0.24	0.15	2
0	0	0	0	0	3	5	5	0	3	0.22	0.08	0.25	0.16	2
0	0	1	0	0	4	5	5	1	2	0.26	0.15	0.25	0.19	1
1	1	1	0	1	4	4	4	0	4	0.31	0.15	0.42	0.22	2
0	0	0	0	0	4	0	6	1	3	0.23	0.17	0.25	0.16	2
0	0	0	0	0	4	1	4	1	2	0.2	0.14	0.19	0.14	1
0	0	0	1	0	4	4	4	1	2	0.33	0.19	0.3	0.23	2
0	0	1	0	0	2	6	8	1	2	0.27	0.14	0.23	0.19	2
1	1	1	0	0	5	0	6	0	2	0.27	0.16	0.26	0.19	2
0	0	0	0	0	5	6	6	1	2	0.34	0.22	0.34	0.25	2
0	0	1	0	0	5	2	4	0	2	0.24	0.12	0.24	0.17	1
0	0	0	0	0	3	0	1	0	2	0.11	0.05	0.11	0.08	1
0	0	0	0	1	4	6	7	1	4	0.43	0.29	0.53	0.31	2
1	0	1	0	1	4	4	7	0	3	0.4	0.22	0.44	0.29	2
0	0	0	0	0	6	0	0	0	4	0.17	0.09	0.27	0.12	1
1	1	1	0	0	4	0	8	1	4	0.28	0.22	0.35	0.2	2
0	0	0	0	0	4	4	6	1	2	0.28	0.17	0.26	0.2	2
1	1	0	1	0	2	0	2	0	3	0.16	0.07	0.17	0.12	2
0	0	0	0	0	4	3	5	1	2	0.24	0.15	0.23	0.17	2
0	0	0	0	0	4	0	5	1	2	0.21	0.15	0.19	0.15	1
0	0	0	0	0	2	0	2	0	2	0.11	0.04	0.09	0.08	2
0	0	0	0	0	3	0	3	0	4	0.14	0.07	0.19	0.1	2
0	0	0	0	0	5	7	5	1	3	0.33	0.19	0.39	0.23	2
0	0	0	0	0	4	0	0	0	2	0.12	0.06	0.12	0.09	2
1	1	1	0	1	1	0	7	1	2	0.22	0.15	0.18	0.16	2
1	0	0	0	0	4	0	8	0	2	0.28	0.16	0.25	0.2	2
0	0	0	0	0	5	7	3	1	2	0.27	0.15	0.28	0.2	1
0	0	0	0	0	5	1	1	1	2	0.17	0.12	0.17	0.12	1
			0	0	1	7	4	1	1	0.16	0.06	0.11	0.12	2
0	0	0	0	0	2	7	2	0	3	0.15	0.04	0.17	0.11	2
0	0	1	0	1	4	3	6	0	4	0.36	0.19	0.46	0.26	2
0	0	0	0	0	3	2	5	0	3	0.19	0.08	0.21	0.14	1
0	0		0	1	5	4	5	0	4	0.39	0.22	0.51	0.28	2
0	0	0	0	0	2	9	7	1	4	0.28	0.12	0.35	0.2	2
1	1	1	0	1	5	6	7	1	2	0.48	0.35	0.47	0.35	1
1	0	1	0	0	5	7	8	0	3	0.42	0.2	0.47	0.3	1
0	0	0	1	0	5	0	0	0	4	0.22	0.11	0.31	0.16	1
0	0	0	1	0	5	0	3	1	2	0.29	0.22	0.27	0.21	2
1	1	1	0	0	4	9	8	0	3	0.4	0.16	0.44	0.29	1
0	0	1	1	0	5	2	7	1	4	0.44	0.33	0.52	0.32	2
0	0	1	0	1	4	7	7	1	3	0.45	0.29	0.49	0.32	2
0	0	0	0	1	4	0	2	1	2	0.22	0.17	0.21	0.16	1
0	0	0	0	1	4	5	8	0	4	0.45	0.24	0.54	0.32	2
0	0	0	0	0	3	0	2	0	2	0.13	0.06	0.12	0.09	2
0	0	0	0	0	4	0	5	0	2	0.21	0.11	0.19	0.15	2
0	0	0	0	0	6	3	7	1	2	0.38	0.3	0.38	0.27	1
0	0	0	0	0	2	0	4	0	3	0.13	0.06	0.14	0.1	2
1	0	0	0	1	5	2	4	0	3	0.33	0.19	0.39	0.24	1
0	0	0	0	1	4	4	7	1	3	0.4	0.29	0.44	0.29	2
0	0	0	0	0	2	7	10	0	3	0.34	0.12	0.34	0.24	2
1	1	1	0	0	5	8	7	1	3	0.4	0.24	0.46	0.29	1
1	1	1	1	0	4	10	8	1	3	0.54	0.3	0.56	0.4	1
0	0	0	0	0	2	0	2	1	2	0.11	0.06	0.09	0.08	2
0	0		0	1	4	0	0	0	4	0.18	0.09	0.26	0.13	2
0	0	0	0	0	5	2	0	0	2	0.16	0.07	0.17	0.12	2
0	0	0	0	0	1	6	7	0	3	0.21	0.07	0.21	0.15	2
0	0	0	1	0	5	10	5	1	1	0.49	0.27	0.42	0.36	1
			0	0	5	2	6	0	1	0.29	0.16	0.23	0.21	2
0	0	1	0	0	2	0	8	1	2	0.2	0.14	0.17	0.15	2
0	0	0	0	0	5	4	4	1	3	0.26	0.17	0.31	0.19	2
0	1	1	0	0	5	0	5	1	4	0.24	0.19	0.33	0.17	1
0	0	0	0	0	2	6	5	1	2	0.2	0.09	0.18	0.14	2
1	0	1	0	0	5	6	8	0	1	0.41	0.2	0.33	0.29	1
1	1	1	0	1	6	2	2	0	2	0.32	0.19	0.34	0.23	1
0	0	0	0	0	4	1	6	0	4	0.24	0.12	0.32	0.17	2
0	0	0	0	0	5	0	1	0	2	0.16	0.08	0.16	0.12	2
0	0	0	0	0	4	0	0	0	1	0.12	0.06	0.1	0.09	2
0	0	0	0	1	4	7	6	0	4	0.41	0.19	0.52	0.3	2
0	0	0	0	0	4	2	2	0	3	0.17	0.07	0.2	0.12	2
0	0	0	0	1	4	5	4	0	1	0.33	0.15	0.27	0.23	2
1	0	1	0	0	6	5	1	1	2	0.24	0.15	0.26	0.17	1
0	0	0	0	1	5	8	7	0	2	0.51	0.27	0.51	0.38	1
0	0	0	0	0	3	0	3	0	3	0.14	0.07	0.16	0.1	1
1	0	0	0	0	6	9	10	1	2	0.57	0.39	0.56	0.42	1
0	0	0	0	1	2	3	4	1	2	0.22	0.13	0.2	0.16	2
0	0	0	1	0	2	0	5	1	1	0.22	0.14	0.15	0.16	2
0	0	0	0	0	4	0	10	1	3	0.34	0.27	0.35	0.24	2
0	0	0	0	0	2	7	4	0	2	0.19	0.06	0.17	0.14	2
1	0	0	1	1	2	3	7	0	2	0.41	0.19	0.35	0.29	2
1	1	1	0	1	4	8	3	0	4	0.34	0.14	0.46	0.24	1
0	0	0	0	0	5	8	3	1	2	0.29	0.15	0.3	0.2	1
0	0	0	0	0	3	3	3	1	2	0.16	0.09	0.15	0.12	2
0	0	0	0	0	5	6	0	1	5	0.19	0.11	0.35	0.14	2
0	0	0	0	0	4	2	3	0	2	0.19	0.08	0.18	0.13	2
0	0	1	0	1	4	4	3	1	3	0.29	0.19	0.33	0.2	2
1	1	1	0	0	6	9	9	1	2	0.53	0.36	0.53	0.39	1
0	0	0	1	0	3	1	5	0	3	0.27	0.12	0.28	0.19	2
0	0	0	0	0	4	0	2	0	2	0.15	0.07	0.15	0.11	2
1	0	1	0	1	5	4	6	0	3	0.42	0.24	0.47	0.3	1
0	0	0	0	0	4	0	0	0	1	0.12	0.06	0.1	0.09	1
0	0	0	0	0	2	0	0	0	2	0.08	0.03	0.08	0.06	2
0	0	0	0	0	6	6	6	0	3	0.39	0.2	0.46	0.28	1
0	0	0	0	0	4	0	2	0	2	0.15	0.07	0.15	0.11	1
0	0	0	1	1	4	0	3	1	2	0.34	0.26	0.32	0.24	1
0	0	0	0	0	4	2	2	1	3	0.17	0.11	0.2	0.12	1
0	0	0	0	1	5	9	9	0	2	0.59	0.33	0.58	0.45	2
1	0	1	0	1	6	8	6	1	4	0.53	0.38	0.66	0.39	1
0	0	0	0	0	4	0	0	0	1	0.12	0.06	0.1	0.09	2
0	0	0	0	0	5	7	6	0	3	0.36	0.16	0.41	0.26	2
0	0	0	0	0	4	2	6	1	4	0.25	0.17	0.33	0.18	2
0	0	0	0	0	4	0	5	1	2	0.21	0.15	0.19	0.15	2
0	0	0	1	0	5	5	2	0	2	0.33	0.14	0.32	0.23	1
0	0	0	0	1	6	9	9	1	3	0.64	0.49	0.69	0.49	2
0	0	0	0	0	5	0	8	0	2	0.32	0.2	0.3	0.23	2
1	1	1	0	1	5	5	5	0	2	0.4	0.22	0.4	0.29	1
1	1	1	0	0	6	8	8	1	4	0.49	0.33	0.61	0.35	1
0	0	0	0	1	4	0	9	1	2	0.41	0.35	0.37	0.29	1
1	0	1	0	0	5	3	2	1	2	0.21	0.14	0.21	0.15	1
0	0	0	1	0	3	2	5	0	3	0.28	0.12	0.29	0.2	1
0	0	0	0	0	3	0	5	0	2	0.18	0.08	0.16	0.13	2
1	0	0	0	0	2	1	5	1	2	0.16	0.09	0.13	0.11	2
0	0	0	0	1	6	4	0	0	2	0.29	0.15	0.32	0.21	2
0	0	0	0	0	4	4	6	1	3	0.28	0.17	0.31	0.2	2
0	0	0	0	0	4	0	1	1	3	0.13	0.09	0.16	0.1	1
1	1	1	0	0	5	7	9	1	3	0.45	0.3	0.49	0.33	2
1	0	0	0	0	5	0	9	0	2	0.35	0.22	0.32	0.25	1
0	0	0	0	0	5	0	0	1	3	0.14	0.11	0.18	0.11	1
1	1	1	0	0	4	7	8	0	4	0.37	0.16	0.46	0.27	2
0	0	0	0	0	5	5	5	0	1	0.3	0.14	0.25	0.22	1
0	0	0	0	0	5	0	3	1	3	0.2	0.15	0.24	0.14	1
0	0	0	0	0	5	3	3	0	3	0.23	0.11	0.28	0.16	2
0	0	1	0	1	4	0	2	0	3	0.22	0.12	0.26	0.16	2
0	0	0	0	0	2	2	2	0	3	0.12	0.04	0.13	0.09	2
0	0	0	1	0	2	2	5	0	3	0.24	0.1	0.24	0.17	2
1	1	1	0	1	4	7	4	1	3	0.35	0.21	0.41	0.25	2
1	0	0	0	0	5	7	7	0	2	0.39	0.18	0.38	0.28	2
1	1	1	1	1	6	8	1	0	1	0.49	0.24	0.45	0.36	2
0	0	0	0	0	5	2	3	1	2	0.22	0.15	0.22	0.16	2
0	0	0	0	0	3	5	0	0	2	0.13	0.04	0.13	0.1	1
0	0	1	0	0	3	3	4	1	3	0.18	0.11	0.21	0.13	2
1	1	1	0	0	4	1	5	1	4	0.22	0.15	0.29	0.16	2
0	0	0	1	0	4	2	0	0	2	0.2	0.08	0.19	0.15	1
0	1	1	0	1	5	3	5	0	2	0.38	0.22	0.37	0.27	1
1	0	0	0	0	4	10	5	1	1	0.32	0.15	0.27	0.23	1
0	0	0	0	0	4	5	10	0	3	0.4	0.2	0.43	0.29	2
0	0	0	0	0	5	0	6	0	3	0.27	0.16	0.3	0.19	2
0	0	1	0	0	4	0	7	1	4	0.25	0.19	0.33	0.18	2
1	1	1	0	0	5	0	0	0	1	0.14	0.07	0.12	0.11	1
0	0	0	0	0	4	0	2	0	2	0.15	0.07	0.15	0.11	2
0	0	0	0	0	4	0	7	0	3	0.25	0.14	0.28	0.18	2
0	0	0	0	1	4	6	5	1	3	0.37	0.24	0.42	0.26	2
0	0	0	0	0	3	6	4	0	2	0.21	0.07	0.2	0.15	2
0	0	0	0	0	4	4	5	1	4	0.25	0.15	0.34	0.18	2
0	0	1	1	0	3	5	8	0	1	0.41	0.18	0.3	0.3	2
0	0	0	0	1	4	4	8	1	2	0.43	0.32	0.41	0.31	2
0	0	0	0	0	2	2	3	0	2	0.13	0.05	0.12	0.1	1
0	0	0	0	0	4	1	3	0	3	0.18	0.08	0.21	0.13	1
0	0	0	0	0	5	1	5	0	3	0.26	0.14	0.3	0.18	2
0	0	0	0	0	5	8	5	1	1	0.34	0.19	0.29	0.24	2
0	0	0	0	0	4	0	8	1	2	0.28	0.22	0.25	0.2	1
0	0	0	0	0	6	0	2	0	2	0.21	0.12	0.22	0.15	2
0	0	0	0	1	4	7	6	0	2	0.41	0.19	0.4	0.3	2
0	0	0	0	0	5	8	7	0	2	0.4	0.18	0.4	0.29	1
			0	0	2	6	7	0	3	0.24	0.09	0.26	0.17	2
0	0	0	0	1	4	0	4	0	1	0.26	0.15	0.21	0.19	2
0	0	0	0	0	3	0	3	0	1	0.14	0.07	0.1	0.1	2
1	0	1	0	0	4	5	10	0	1	0.4	0.2	0.31	0.29	1
0	0	0	0	0	4	6	1	1	2	0.18	0.09	0.19	0.13	1
0	0	0	0	1	3	7	5	0	3	0.34	0.14	0.37	0.24	2
0	0	0	0	0	5	0	5	0	2	0.24	0.14	0.23	0.17	2
0	0	0	0	0	5	9	10	1	4	0.51	0.33	0.61	0.38	1
0	0	0	0	1	6	3	7	1	2	0.49	0.42	0.49	0.36	2
0	0	0	0	0	3	0	0	0	2	0.1	0.04	0.1	0.08	2
0	0	0	0	0	4	5	5	0	2	0.26	0.11	0.25	0.19	2
			0	0	4	0	4	0	1	0.19	0.1	0.14	0.14	2
1	0	0	0	1	4	6	6	0	2	0.4	0.19	0.39	0.29	2
1	0	0	0	0	3	8	6	1	2	0.28	0.14	0.26	0.2	2
0	0	0	0	0	4	1	2	0	2	0.16	0.07	0.15	0.12	1
0	0	0	0	0	4	0	9	0	2	0.31	0.18	0.27	0.22	2
0	0	0	0	0	1	0	0	0	3	0.07	0.03	0.08	0.05	2
0	0	0	0	0	3	0	1	0	2	0.11	0.05	0.11	0.08	1
0	0	0	0	0	4	4	9	1	3	0.36	0.24	0.38	0.26	2
1	1	1	0	0	5	4	7	1	2	0.35	0.24	0.33	0.25	2
0	0	0	0	0	5	1	9	1	2	0.37	0.3	0.34	0.26	1
0	0	1	0	0	4	0	8	0	3	0.28	0.16	0.3	0.2	1
0	0	0	0	0	4	7	8	0	1	0.37	0.16	0.29	0.27	1
1	1	1	0	1	5	0	5	1	2	0.33	0.29	0.33	0.24	1
0	0	0	0	0	2	0	4	1	3	0.13	0.08	0.14	0.1	2
0	0	0	0	0	5	8	5	0	3	0.34	0.14	0.4	0.24	1
0	0	0	0	0	4	6	8	0	3	0.36	0.16	0.39	0.25	2
0	0	0	0	0	3	7	2	0	3	0.18	0.06	0.21	0.13	1
1	0	0	0	0	4	0	3	0	1	0.17	0.08	0.13	0.12	1
0	0	0	0	0	5	0	0	1	2	0.14	0.11	0.15	0.11	2
0	0	0	1	0	5	7	0	0	3	0.3	0.11	0.36	0.21	1
			0	0	4	6	5	1	3	0.27	0.15	0.31	0.19	2
0	0	0	0	0	3	0	5	0	3	0.18	0.08	0.19	0.13	2
0	0	1	0	0	4	0	6	0	1	0.23	0.12	0.17	0.16	2
0	0	0	0	0	5	6	7	0	1	0.38	0.18	0.31	0.27	1
1	0	1	0	0	5	3	6	0	2	0.31	0.16	0.3	0.22	1
0	0	0	0	0	3	0	1	1	2	0.11	0.07	0.11	0.08	2
0	0	0	0	0	3	2	0	1	2	0.11	0.06	0.11	0.08	2
0	0	0	0	0	5	1	7	0	1	0.31	0.18	0.24	0.22	1
0	0	0	0	1	6	0	2	0	3	0.3	0.19	0.36	0.21	2
0	0	0	0	0	4	0	8	1	2	0.28	0.22	0.25	0.2	2
1	1	0	0	0	5	0	5	0	2	0.24	0.14	0.23	0.17	2
0	0	0	0	0	6	2	5	1	1	0.31	0.24	0.26	0.22	2
0	0	0	0	0	1	0	0	0	1	0.07	0.03	0.05	0.05	2
1	1	1	0	0	3	5	6	1	4	0.25	0.14	0.32	0.18	2
1	1	1	0	0	5	5	10	1	4	0.46	0.33	0.55	0.33	1
0	0	0	0	1	5	7	10	1	4	0.59	0.45	0.69	0.45	2
0	0	0	0	0	2	4	1	1	1	0.12	0.06	0.09	0.09	2
0	0	0	1	0	4	6	7	1	2	0.45	0.27	0.4	0.32	1
0	0	0	0	0	1	1	3	0	2	0.1	0.04	0.09	0.08	2
0	0	0	0	1	3	2	9	0	3	0.39	0.22	0.4	0.28	2
0	0	0	0	1	5	8	6	0	2	0.48	0.24	0.48	0.35	2
1	0	1	0	0	5	5	3	0	1	0.25	0.11	0.21	0.18	1
0	0	0	0	0	4	0	6	0	3	0.23	0.12	0.25	0.16	2
0	0	0	0	1	4	0	0	0	3	0.18	0.09	0.22	0.13	2
1	0	1	0	0	4	0	4	1	3	0.19	0.14	0.21	0.14	1
0	0	0	0	1	5	9	7	1	2	0.53	0.35	0.52	0.39	2
0	0	0	0	0	2	0	7	0	1	0.18	0.09	0.12	0.13	2
0	0	1	0	1	4	3	6	0	2	0.36	0.19	0.34	0.26	1
0	0	0	0	1	3	0	9	1	2	0.36	0.29	0.31	0.26	1
0	0	0	0	0	5	5	4	1	3	0.28	0.17	0.33	0.2	1
0	0	0	1	0	4	2	2	0	2	0.25	0.11	0.23	0.18	1
0	0	0	1	0	4	0	0	1	2	0.18	0.12	0.17	0.13	1
0	0	0	0	0	4	1	2	0	2	0.16	0.07	0.15	0.12	1
0	0	0	0	0	3	8	8	1	2	0.34	0.17	0.31	0.24	2
0	0	0	0	0	5	0	3	0	3	0.2	0.11	0.24	0.14	2
0	0	0	0	0	2	4	5	0	3	0.18	0.07	0.19	0.13	2
1	1	1	0	0	4	0	0	0	2	0.12	0.06	0.12	0.09	1
1	0	1	0	1	5	8	5	0	4	0.45	0.22	0.57	0.32	1
0	0	0	0	0	2	0	7	0	2	0.18	0.09	0.15	0.13	2
0	0	0	0	0	5	8	5	0	3	0.34	0.14	0.4	0.24	1
1	1	1	0	0	5	2	4	0	2	0.24	0.12	0.24	0.17	1
			0	0	3	2	5	0	3	0.19	0.08	0.21	0.14	2
0	0	0	0	0	5	0	3	0	1	0.2	0.11	0.16	0.14	2
0	0	0	0	0	5	8	10	1	3	0.5	0.33	0.54	0.37	1
0	0	0	0	0	5	3	3	0	3	0.23	0.11	0.28	0.16	2
0	0	0	0	1	2	1	2	1	4	0.16	0.1	0.22	0.12	2
1	1	1	0	1	4	3	6	0	3	0.36	0.19	0.4	0.26	1
1	0	1	0	1	5	8	7	1	4	0.51	0.35	0.63	0.38	2
1	0	1	0	0	4	2	6	0	2	0.25	0.12	0.23	0.18	1
1	0	1	0	0	3	1	0	1	3	0.11	0.06	0.13	0.08	1
1	1	0	0	0	3	6	6	0	2	0.26	0.1	0.24	0.18	2
0	0	0	0	1	3	1	5	1	3	0.26	0.19	0.28	0.19	2
0	0	0	0	0	5	7	5	0	3	0.33	0.14	0.39	0.23	1
1	1	0	0	1	5	9	9	1	3	0.59	0.42	0.64	0.45	2
0	0	0	0	0	5	3	2	1	1	0.21	0.14	0.17	0.15	1
0	0	0	1	0	4	1	6	0	5	0.34	0.18	0.48	0.24	2
0	0	0	0	0	6	4	3	0	4	0.28	0.14	0.4	0.2	2
0	0	0	0	1	3	5	5	1	1	0.31	0.19	0.24	0.22	1
1	0	0	0	0	5	4	5	0	1	0.29	0.14	0.24	0.21	1
0	0	0	0	0	3	8	8	1	3	0.34	0.17	0.36	0.24	2
1	1	1	0	0	4	4	4	0	5	0.23	0.1	0.37	0.16	2
0	0	0	0	0	4	7	6	1	1	0.31	0.17	0.25	0.22	2
0	0	0	0	0	5	4	7	0	3	0.35	0.18	0.39	0.25	2
0	0	1	1	0	5	7	4	1	3	0.41	0.24	0.46	0.3	1
0	0	0	0	1	5	7	7	0	4	0.5	0.27	0.61	0.36	1
0	0	0	0	0	5	0	5	1	2	0.24	0.19	0.23	0.17	2
1	1	1	0	1	4	3	5	1	4	0.33	0.24	0.43	0.23	1
0	0	0	0	0	5	0	1	0	1	0.16	0.08	0.13	0.12	1
0	0	0	0	1	5	2	1	0	3	0.25	0.13	0.31	0.18	1
0	0	0	0	0	2	0	2	1	3	0.11	0.06	0.12	0.08	2
0	0	0	0	0	6	0	3	1	2	0.23	0.19	0.24	0.17	2
0	0	0	0	1	5	3	5	0	5	0.38	0.22	0.55	0.27	2
0	0	0	0	0	4	6	4	1	2	0.25	0.14	0.24	0.18	2
0	0	0	0	0	5	0	5	0	2	0.24	0.14	0.23	0.17	1
0	0	0	0	0	5	1	1	0	2	0.17	0.08	0.17	0.12	1
1	0	1	0	0	4	0	0	0	1	0.12	0.06	0.1	0.09	1
0	0	0	0	0	3	3	5	0	2	0.2	0.08	0.18	0.15	2
1	0	0	0	0	2	0	4	0	3	0.13	0.06	0.14	0.1	2
1	0	1	0	1	4	8	7	0	3	0.46	0.22	0.51	0.33	2
0	0	0	0	0	2	0	9	0	1	0.23	0.11	0.15	0.16	2
0			0	0	4	0	0	1	1	0.12	0.08	0.1	0.09	1
0	0	0	0	0	5	1	4	0	3	0.23	0.12	0.27	0.17	1
0	0	0	0	1	5	0	6	0	3	0.36	0.24	0.41	0.26	2
0	0	0	1	0	5	7	1	0	2	0.32	0.12	0.33	0.23	1
0	0	0	0	0	4	7	8	0	4	0.37	0.16	0.46	0.27	2
0	0	0	0	0	2	5	2	0	2	0.14	0.04	0.13	0.1	2
0	0	0	0	0	4	6	6	1	3	0.3	0.17	0.34	0.21	2
0	0	0	0	0	2	2	2	0	3	0.12	0.04	0.13	0.09	2
0	0	0	0	1	4	7	6	0	3	0.41	0.19	0.46	0.3	2
0	0	0	0	0	5	0	2	0	1	0.18	0.1	0.15	0.13	2
1	1	1	0	1	4	3	6	1	3	0.36	0.26	0.4	0.26	1
1	1	1	0	1	5	5	3	1	2	0.34	0.24	0.35	0.24	1
0	0	0	0	0	5	2	2	0	2	0.2	0.1	0.2	0.14	1
0	0	0	0	0	4	0	2	0	2	0.15	0.07	0.15	0.11	2
1	0	1	0	0	5	0	9	0	3	0.35	0.22	0.38	0.25	1
0	0	0	1	1	5	7	5	0	2	0.56	0.29	0.54	0.41	1
0	0	0	0	0	4	1	2	0	3	0.16	0.07	0.19	0.12	1
0	0	0	0	0	4	5	5		2	0.26		0.25	0.19	2
1	0	1	0	0	5	5	10	1	3	0.46	0.33	0.49	0.33	1
1	0	0	0	0	5	7	10	1	1	0.49	0.33	0.4	0.35	2
0	0	0	0	1	4	3	5	1	2	0.33	0.24	0.31	0.23	1
0	0	0	0	0	4	1	3	0	2	0.18	0.08	0.17	0.13	1
0	0	0	0	0	5	1	1	0	2	0.17	0.08	0.17	0.12	1
0	0	1	0	0	2	0	0	1	1	0.08	0.05	0.06	0.06	2
			0	0	6	0	5	0	1	0.28	0.18	0.24	0.2	2
0	0	0	0	0	3	10	4	0	1	0.25	0.07	0.2	0.18	2
0	0	0	0	0	4	0	4	0	2	0.19	0.1	0.18	0.14	2
0	0	0	1	0	4	8	9	1	3	0.54	0.33	0.55	0.4	1
0	0	0	0	0	3	0	1	0	2	0.11	0.05	0.11	0.08	2
0	0	0	0	0	6	0	7	0	3	0.34	0.22	0.39	0.24	2
0	0	0	0	0	6	7	5	1	1	0.38	0.24	0.33	0.27	2
0	0	0	0	0	3	0	6	0	1	0.2	0.1	0.14	0.14	2
0	0	0	0	0	2	0	3	0	2	0.12	0.05	0.1	0.09	2
0	0	0	0	1	4	6	6	0	3	0.4	0.19	0.44	0.29	2
0	0	0	1	0	2	6	2	0	4	0.22	0.07	0.28	0.16	2
0	0	0	0	0	2	2	6	1	3	0.18	0.11	0.19	0.13	2
1	0	1	0	0	4	5	4	0	4	0.24	0.1	0.33	0.17	1
1	0	1	0	1	4	3	7	1	3	0.39	0.29	0.42	0.28	1
1	0	1	1	0	4	5	3	1	1	0.31	0.17	0.24	0.22	1
0	0	0	0	0	4	1	2	0	1	0.16	0.07	0.13	0.12	2
0	0	0	0	0	4	0	5	0	3	0.21	0.11	0.23	0.15	2
1	1	1	0	1	6	7	10	0	3	0.64	0.42	0.69	0.49	2
1	1	1	1	1	4	9	7	1	1	0.6	0.38	0.51	0.45	1
0	0	0	0	1	4	3	5	1	2	0.33	0.24	0.31	0.23	2
0	0	1	0	0	3	0	1	0	3	0.11	0.05	0.13	0.08	1
0	0	0	1	0	4	3	6	0	2	0.37	0.18	0.33	0.26	1
0	0	0	0	0	6	3	5	0	2	0.32	0.18	0.33	0.23	2
0	0	0	0	0	3	0	0	1	1	0.1	0.06	0.08	0.08	2
1	1	1	0	0	3	4	2	1	3	0.15	0.08	0.18	0.11	1
0	0	0	0	0	4	1	5	0	2	0.22	0.11	0.2	0.16	2
1	0	1	0	0	2	1	4	0	2	0.14	0.06	0.12	0.1	2
0	0	0	0	0	4	0	0	0	2	0.12	0.06	0.12	0.09	1
0	0	0	0	1	4	4	7	1	3	0.4	0.29	0.44	0.29	2
0	0	0	1	0	5	5	5	1	2	0.42	0.27	0.4	0.3	1
1	0	0	0	0	2	1	5	1	2	0.16	0.09	0.13	0.11	2
0	0	0	0	1	5	9	6	1	1	0.5	0.32	0.44	0.36	1
1	0	0	0	0	4	2	4	0	4	0.21	0.1	0.28	0.15	1
0	0	0	0	1	4	4	6	1	2	0.37	0.26	0.35	0.27	2
1	1	1	1	1	5	5	3	0	3	0.46	0.24	0.51	0.34	1
0	0	0	0	0	5	3	1	0	2	0.19	0.08	0.19	0.13	1
0	0	0	0	0	4	0	5	1	2	0.21	0.15	0.19	0.15	2
0	0	0	0	0	5	0	2	1	1	0.18	0.14	0.15	0.13	2
0	0	0	0	0	5	1	6	1	4	0.28	0.22	0.37	0.2	2
1	1	1	0	0	5	7	8	1	3	0.42	0.27	0.47	0.3	2
0	0	0	0	0	5	0	4	1	1	0.22	0.17	0.18	0.16	1
0	0	0	0	0	4	0	2	0	3	0.15	0.07	0.18	0.11	2
			0	0	3	0	3	0	1	0.14	0.07	0.1	0.1	2
0	0	0	0	0	4	2	8	1	3	0.3	0.22	0.33	0.22	1
0	0	0	1	0	4	0	5	0	3	0.3	0.16	0.32	0.21	1
0	0	0	0	0	3	0	0	1	2	0.1	0.06	0.1	0.08	2
0	0	0	0	0	4	0	0	1	1	0.12	0.08	0.1	0.09	1
0	0	0	0	0	5	1	2	0	1	0.19	0.1	0.16	0.14	1
1	0	0	0	0	3	0	5	0	2	0.18	0.08	0.16	0.13	1
0	0	0	0	0	3	2	5	0	4	0.19	0.08	0.26	0.14	2
1	1	1	1	1	5	10	5	1	3	0.6	0.38	0.65	0.45	1
1	1	1	1	1	6	8	6	1	2	0.65	0.49	0.65	0.5	1
0	0	0	0	0	4	1	3	0	4	0.18	0.08	0.25	0.13	1
0	0	0	0	0	3	4	2	0	2	0.15	0.06	0.15	0.11	2
1	0	1	0	0	4	6	7	0	4	0.33	0.14	0.42	0.23	2
0	0	0	0	0	6	0	7	0	2	0.34	0.22	0.33	0.24	1
0	0	1	0	0	4	8	2	1	3	0.22	0.11	0.27	0.16	1
0	0	0	0	0	4	0	6	0	2	0.23	0.12	0.21	0.16	1
1	0	0	0	1	4	2	6	0	2	0.34	0.19	0.32	0.25	2
0	0	0	0	1	6	10	8	0	3	0.62	0.36	0.68	0.48	1
0	0	0	0	0	4	0	6	0	1	0.23	0.12	0.17	0.16	1
0	0	0	0	0	4	2	1	1	3	0.15	0.09	0.18	0.11	2
1	1	0	1	0	5	8	8	1	2	0.56	0.36	0.53	0.42	1
0	0	0	0	0	4	0	5	0	2	0.21	0.11	0.19	0.15	1
1	1	0	0	0	2	3	4	1	3	0.15	0.08	0.17	0.11	2
1	0		0	1	4	8	5	1	2	0.4	0.24	0.39	0.28	2
0	0	0	0	0	4	0	3	0	2	0.17	0.08	0.16	0.12	1
1	0	0	0	0	4	0	9	1	3	0.31	0.24	0.32	0.22	1
0	0	0	0	1	6	0	7	0	3	0.45	0.32	0.5	0.32	2
1	1	0	0	0	2	3	7	0	2	0.21	0.09	0.18	0.15	2
0	0	0	1	0	5	7	7	1	2	0.51	0.33	0.48	0.38	1
0	0	0	0	0	4	3	7	1	3	0.29	0.19	0.32	0.21	2
0	0	0	0	0	4	3	3	0	3	0.19	0.08	0.23	0.14	1
0	0	0	1	0	4	6	5	1	2	0.38	0.22	0.35	0.27	1
0	0	0	0	0	5	7	0	0	2	0.2	0.07	0.22	0.15	2
1	1	1	0	0	5	6	8	1	4	0.41	0.27	0.51	0.29	2
0	0	0	0	1	5	0	5	1	2	0.33	0.29	0.33	0.24	1
0	0	0	0	1	4	5	5	0	2	0.36	0.17	0.34	0.25	1
1	1	1	0	0	4	0	0	0	1	0.12	0.06	0.1	0.09	2
1	0	0	0	0	5	8	8	0	2	0.44	0.2	0.42	0.31	2
0	0	0	0	0	3	5	7	1	1	0.27	0.15	0.2	0.19	2
			0	1	3	0	0	1	1	0.15	0.1	0.12	0.11	2
0	0	0	1	0	3	2	5	0	1	0.28	0.12	0.2	0.2	1
0	0	0	0	0	4	4	3	0	4	0.2	0.08	0.29	0.15	2
1	1	1	0	0	4	5	5	0	5	0.26	0.11	0.41	0.19	2
0	0	0	0	0	3	3	5	0	2	0.2	0.08	0.18	0.15	2
0	0	1	0	0	4	7	7	1	2	0.34	0.19	0.32	0.24	2
0	1	1	0	0	5	0	3	0	1	0.2	0.11	0.16	0.14	1
0	0	0	0	0	2	0	2	0	2	0.11	0.04	0.09	0.08	2
0	0	0	0	1	5	6	5	0	3	0.42	0.22	0.48	0.3	2
1	1	1	0	0	4	4	5	1	3	0.25	0.15	0.28	0.18	1
1	0	0	1	1	4	0	5	0	2	0.4	0.24	0.36	0.29	1
0	0	0	0	0	2	0	3	0	2	0.12	0.05	0.1	0.09	2
0	0	0	0	0	3	0	0	0	1	0.1	0.04	0.08	0.08	2
0	0	0	0	0	3	2	5	1	4	0.19	0.12	0.26	0.14	2
0	0	0	0	0	5	1	5	0	2	0.26	0.14	0.25	0.18	1
1	1	1	1	1	5	9	9	0	2	0.7	0.42	0.68	0.56	2
1	0	1	0	0	4	8	5	1	2	0.3	0.15	0.29	0.21	1
1	1	1	1	0	5	5	10	0	1	0.58	0.33	0.47	0.43	1
0	0	0	0	0	2	5	7	0	2	0.23	0.09	0.2	0.17	1
0	0	0	0	0	4	0	1	1	1	0.13	0.09	0.11	0.1	1
0	0	0	0	0	4	0	7	0	2	0.25	0.14	0.23	0.18	1
1	1	1	1	1	4	7	8	1	3	0.6	0.42	0.62	0.45	1
0	0	0	0	0	3	0	3	0	1	0.14	0.07	0.1	0.1	1
0	0	0	0	0	5	1	7	0	1	0.31	0.18	0.24	0.22	2
0	0	0	0	1	4	7	8	0	1	0.48	0.24	0.4	0.35	2
0	0	0	0	0	4	0	1	0	1	0.13	0.06	0.11	0.1	1
0	0	0	0	0	5	0	8	1	3	0.32	0.27	0.35	0.23	2
0	0	0	0	0	4	3	4	0	3	0.22	0.1	0.25	0.15	1
0	0	0	0	0	4	3	2	0	2	0.18	0.07	0.17	0.13	2
0	0	0	0	0	1	3	4	0	3	0.13	0.04	0.13	0.1	2
0	0	0	0	0	3	4	6	0	3	0.24	0.1	0.26	0.17	2
1	0	0	0	1	5	5	7	0	2	0.47	0.27	0.46	0.34	2
0	0	0	0	0	3	8	6	0	3	0.28	0.1	0.31	0.2	2
0	0	0	0	0	6	5	4	1	3	0.32	0.22	0.39	0.23	2
0	0	1	1	0	5	5	5	1	3	0.42	0.27	0.46	0.3	1
0	0	0	0	0	4	9	9	0	4	0.43	0.18	0.53	0.31	1
0	0	0	0	0	5	8	7	0	2	0.4	0.18	0.4	0.29	1
1	1	1	0	1	6	0	4	1	2	0.35	0.32	0.36	0.25	1
0	0	0	0	0	4	0	0	0	1	0.12	0.06	0.1	0.09	1
0	0	0	0	1	4	5	6	0	2	0.39	0.19	0.37	0.28	1
0	0	1	0	0	4	5	8	1	1	0.34	0.22	0.27	0.25	1
1	0	1	0	0	4	4	4	0	3	0.23	0.1	0.26	0.16	1
0	0	0	0	0	3	6	4	0	3	0.21	0.07	0.24	0.15	2
0	0	0	0	0	5	2	0	0	2	0.16	0.07	0.17	0.12	1
0	1	1	0	1	5	5	3	1	4	0.34	0.24	0.47	0.24	1
			0	1	4	0	8	1	3	0.38	0.32	0.4	0.27	2
			0	0	2	0	5	0	4	0.15	0.07	0.19	0.11	2
0	0	0	0	0	2	0	3	1	2	0.12	0.07	0.1	0.09	2
0	0	0	0	0	3	3	3	0	3	0.16	0.07	0.19	0.12	2
0	0	0	0	0	3	0	0	0	3	0.1	0.04	0.12	0.08	1
0	0	0	0	0	5	5	7	1	3	0.36	0.24	0.41	0.26	2
0	0	0	0	0	4	3	5	1	2	0.24	0.15	0.23	0.17	2
			0	0	5	3	7	0	3	0.33	0.18	0.37	0.24	2
			0	0	3	8	10	1	3	0.4	0.22	0.41	0.29	2
0	0	0	0	0	4	6	4	0	1	0.25	0.1	0.2	0.18	2
1	0	0	0	0	3	5	5	0	1	0.22	0.08	0.17	0.16	2
0	0	0	0	1	3	1	3	1	3	0.21	0.15	0.24	0.15	2
0	0	0	0	0	4	7	5	1	2	0.29	0.15	0.28	0.2	2
0	0	0	0	0	3	0	0	1	3	0.1	0.06	0.12	0.08	2
0	0	0	0	0	5	3	1	0	3	0.19	0.08	0.24	0.13	1
1	1	0	0	0	4	3	6	0	3	0.26	0.12	0.29	0.19	2
0	0	0	1	0	4	2	8	1	2	0.42	0.3	0.37	0.3	1
0	0	0	0	0	4	9	9	1	3	0.43	0.24	0.46	0.31	1
0	0	0	0	0	4	3	1	0	3	0.16	0.06	0.19	0.11	2
0	0	0	0	0	4	1	5	0	2	0.22	0.11	0.2	0.16	1
0	0	0	0	0	4	0	2	0	2	0.15	0.07	0.15	0.11	1
0	0	0	0	0	4	1	5	0	2	0.22	0.11	0.2	0.16	2
0	0	0	0	0	5	8	7	0	2	0.4	0.18	0.4	0.29	2
0	0	0	0	1	5	7	8	0	2	0.53	0.3	0.52	0.39	1
0	0	0	0	0	3	5	7	1	5	0.27	0.15	0.4	0.19	2
0	0	0	0	0	4	3	7	0	3	0.29	0.14	0.32	0.21	1
0	0	0	0	0	4	0	0	0	2	0.12	0.06	0.12	0.09	2
0	0	0	0	1	5	4	9	1	2	0.52	0.42	0.5	0.38	1
0	0	0	0	0	5	4	4	0	2	0.26	0.12	0.26	0.19	1
0	0	1	0	0	5	0	5	0	3	0.24	0.14	0.28	0.17	1
0	0	0	0	0	5	5	5	1	1	0.3	0.19	0.25	0.22	1
0	0	0	0	0	3	1	1	0	2	0.12	0.05	0.11	0.09	1
0	0	0	0	0	2	2	0	1	3	0.09	0.05	0.11	0.07	2
1	1	1	0	1	5	10	7	0	3	0.54	0.27	0.6	0.4	2
0	0	0	0	0	4	0	0	0	1	0.12	0.06	0.1	0.09	2
			0	0	4	0	5	0	2	0.21	0.11	0.19	0.15	2
0	0	0	0	1	4	6	7	0	2	0.43	0.22	0.41	0.31	2
0	0	0	1	0	4	8	0	1	3	0.27	0.12	0.31	0.19	1
0	0	0	0	0	5	0	8	1	3	0.32	0.27	0.35	0.23	2
			0	1	4	6	10	0	3	0.53	0.3	0.56	0.39	2
0	0	0	0	0	4	2	5	0	4	0.23	0.11	0.31	0.16	2
0	0	0	1	0	2	0	3	0	4	0.18	0.07	0.22	0.13	2
0	0	0	0	0	4	5	7	0	4	0.31	0.14	0.4	0.22	1
0	0	1	0	0	4	4	10	1	3	0.39	0.27	0.41	0.28	2
0	0	0	0	0	2	1	2	0	3	0.11	0.04	0.12	0.08	2
0	0	0	0	0	5	0	8	0	3	0.32	0.2	0.35	0.23	1
0	0	0	0	0	4	0	2	0	2	0.15	0.07	0.15	0.11	2
0	0	0	0	1	4	5	8	0	2	0.45	0.24	0.42	0.32	2
0	0	0	1	0	5	0	5	1	3	0.35	0.27	0.37	0.25	1
0	0	0	0	0	4	2	5	1	3	0.23	0.15	0.26	0.16	1
0	0	0	0	0	2	2	0	0	3	0.09	0.03	0.11	0.07	2
1	0	1	0	1	6	9	9	1	3	0.64	0.49	0.69	0.49	2
1	0	0	0	0	4	2	3	0	2	0.19	0.08	0.18	0.13	1
1	1	0	1	0	5	6	6	1	2	0.46	0.3	0.44	0.34	1
1	1	1	0	1	4	6	6	1	3	0.4	0.26	0.44	0.29	2
0	0	1	0	0	5	0	2	1	4	0.18	0.14	0.26	0.13	2
0	0	0	1	0	2	0	4	0	2	0.2	0.08	0.16	0.14	2
0	0	0	0	0	2	0	0	1	3	0.08	0.05	0.1	0.06	2
0	0	1	0	0	6	0	7	0	1	0.34	0.22	0.28	0.24	1
			0	0	2	0	0	0	2	0.08	0.03	0.08	0.06	2
0	0	0	0	0	5	10	0	0	2	0.23	0.07	0.26	0.17	1
0	0	0	1	0	4	7	4	1	2	0.37	0.19	0.34	0.26	1
0	0	0	0	0	3	0	4	0	3	0.16	0.07	0.17	0.12	2
1	0	1	0	1	6	5	8	0	3	0.55	0.36	0.61	0.41	2
0	0	0	0	0	4	6	6	0	1	0.3	0.12	0.24	0.21	1
0	0	0	0	0	4	7	2	0	2	0.21	0.07	0.21	0.15	2
0	0	0	0	0	2	3	1	0	1	0.11	0.04	0.08	0.08	1
0	0	1	0	1	5	3	8	1	4	0.47	0.38	0.57	0.34	1
0	0	0	0	1	5	10	4	0	3	0.44	0.19	0.52	0.32	1
1	0	0	0	0	4	2	2	1	3	0.17	0.11	0.2	0.12	1
0	0	0	0	1	4	2	5	0	2	0.32	0.17	0.3	0.22	2
0	0	1	1	0	3	0	10	0	2	0.4	0.22	0.33	0.29	1
0	0	0	0	0	5	0	2	1	3	0.18	0.14	0.22	0.13	1
0	0	0	0	1	2	5	5	1	2	0.27	0.15	0.24	0.19	2
0	0	0	1	0	4	0	3	1	3	0.25	0.17	0.27	0.18	1
0	0	0	0	0	4	3	8	0	2	0.32	0.16	0.29	0.23	2
			0	1	6	2	2	0	3	0.32	0.19	0.39	0.23	2
0	0	0	0	1	4	5	5	0	3	0.36	0.17	0.4	0.25	1
1	1	1	0	0	4	7	6	1	3	0.31	0.17	0.35	0.22	2
0	0	0	0	0	4	4	2	0	3	0.18	0.07	0.22	0.13	1
0	0	1	0	1	5	0	1	0	2	0.23	0.13	0.24	0.16	1
1	1	1	0	1	5	6	4	1	2	0.39	0.26	0.39	0.28	1
0	0	0	0	0	4	5	5	1	3	0.26	0.15	0.3	0.19	2
1	0	0	0	0	5	5	3	0	1	0.25	0.11	0.21	0.18	1
0	0	0	0	0	3	6	0	1	2	0.14	0.06	0.14	0.1	2
0	0	0	0	0	2	0	2	0	2	0.11	0.04	0.09	0.08	1
0	0	0	0	0	2	4	4	1	3	0.16	0.08	0.18	0.12	2
0	0	0	0	0	4	0	1	0	2	0.13	0.06	0.13	0.1	2
0	0	0	0	0	4	8	2	0	1	0.22	0.07	0.19	0.16	2
0	0	0	0	0	4	7	5	0	2	0.29	0.11	0.28	0.2	2
1	0	1	0	1	3	9	7	1	3	0.42	0.24	0.46	0.31	1
0	0	0	0	0	4	0	3	0	2	0.17	0.08	0.16	0.12	2
0	0	0	0	0	2	1	2	0	1	0.11	0.04	0.08	0.08	2
1	1	0	0	0	4	2	0	0	3	0.13	0.06	0.17	0.1	2
0	0	0	0	1	5	1	3	1	1	0.29	0.24	0.24	0.21	1
0	0	0	0	0	3	2	5	0	2	0.19	0.08	0.17	0.14	1
0	0	0	1	1	4	0	8	1	3	0.5	0.42	0.51	0.37	1
0	0	0	0	0	5	3	6	1	1	0.31	0.22	0.25	0.22	1
0	0	0	0	0	4	3	0	0	3	0.14	0.06	0.18	0.1	2
0	0	0	0	0	4	0	2	1	3	0.15	0.11	0.18	0.11	1
0	0	0	0	1	5	10	10	0	1	0.64	0.36	0.56	0.49	2
1	1	1	0	0	5	5	5	1	1	0.3	0.19	0.25	0.22	1
0	0	0	0	0	1	4	0	0	3	0.09	0.03	0.1	0.07	2
0	0	0	0	0	5	9	9	1	4	0.48	0.3	0.59	0.35	1
1	0	1	0	0	5	0	3	0	3	0.2	0.11	0.24	0.14	1
1	1	0	0	1	5	5	8	0	3	0.5	0.3	0.55	0.37	2
0	0	0	0	0	3	0	0	0	2	0.1	0.04	0.1	0.08	2
0	0	0	0	0	4	4	8	0	3	0.33	0.16	0.36	0.24	2
0	0	0	0	0	4	1	5	0	2	0.22	0.11	0.2	0.16	1
0	0	0	0	0	5	6	6	0	2	0.34	0.16	0.34	0.25	1
0	0	0	0	0	5	2	2	0	2	0.2	0.1	0.2	0.14	1
0	0	0	0	0	3	0	2	0	4	0.13	0.06	0.18	0.09	2
0	0	0	0	0	5	3	2	1	2	0.21	0.14	0.21	0.15	1
0	0	0	0	1	4	6	7	0	2	0.43	0.22	0.41	0.31	2
0	0	0	0	0	3	5	5	1	4	0.22	0.12	0.3	0.16	2
0	0	0	0	0	3	4	4	1	2	0.19	0.11	0.18	0.14	1
0	0	0	0	0	4	7	7	0	3	0.34	0.14	0.38	0.24	1
0	0	0	0	0	5	0	0	0	3	0.14	0.07	0.18	0.11	2
0	0	0	0	0	4	4	6	0	4	0.28	0.12	0.36	0.2	2
0	0	0	0	0	4	0	3	1	2	0.17	0.12	0.16	0.12	2
0	0	0	0	0	3	8	7	0	3	0.31	0.11	0.34	0.22	1
0	0	0	0	1	2	3	7	0	4	0.3	0.14	0.36	0.21	2
0	0	0	0	0	6	0	6	1	4	0.31	0.27	0.42	0.22	2
			0	0	4	5	0	0	2	0.16	0.06	0.16	0.11	2
1	0	0	0	0	6	4	10	1	3	0.49	0.39	0.53	0.36	1
0	1	1	0	0	5	8	0	1	1	0.21	0.11	0.19	0.15	1
0	0	0	0	0	3	0	1	0	2	0.11	0.05	0.11	0.08	1
0	0	0	0	0	4	1	0	1	2	0.13	0.08	0.13	0.09	2
0	0	0	0	1	5	6	0	0	2	0.27	0.12	0.29	0.19	2
0	0	0	1	0	2	3	5	0	3	0.25	0.1	0.26	0.18	2
1	1	1	0	1	4	4	5	0	3	0.34	0.17	0.39	0.24	2
1	0	1	0	0	5	7	2	0	2	0.25	0.1	0.26	0.18	1
0	0	0	0	0	4	5	4	0	1	0.24	0.1	0.19	0.17	2
0	0	0	0	0	4	3	8	0	3	0.32	0.16	0.34	0.23	2
0	0	0	0	0	3	0	1	0	1	0.11	0.05	0.09	0.08	1
0	0	0	0	0	3	6	5	1	3	0.23	0.12	0.26	0.17	2
0	0	0	0	0	4	1	5	0	2	0.22	0.11	0.2	0.16	1
1	1	1	0	1	5	5	4	0	3	0.37	0.19	0.44	0.27	2
0	0	0	0	1	5	1	5	0	3	0.35	0.22	0.4	0.25	2
0	0	0	0	0	2	0	3	1	2	0.12	0.07	0.1	0.09	2
0	0	0		0		0	0							2
1	1		0	0	5	7	7	0	3	0.39	0.18	0.44	0.28	2
0	0	0	0	1	5	9	5	0	3	0.46	0.22	0.53	0.34	1
0	0	0	0	0	3	0	0	0	4	0.1	0.04	0.15	0.08	2
0	0	0	0	0	4	9	4	0	3	0.28	0.1	0.33	0.2	2
0	0	0	0	0	5	8	4	0	3	0.31	0.12	0.38	0.22	2
0	0	0	1	0	4	0	8	1	2	0.39	0.3	0.34	0.28	1
0	0	1	0	0	1	1	10	1	4	0.22	0.14	0.25	0.16	2
0	0	0	0	0	2	4	6	0	3	0.2	0.07	0.21	0.14	1
1	1	1	0	0	5	0	8	1	3	0.32	0.27	0.35	0.23	1
1	1	0	0	0	4	2	6	1	2	0.25	0.17	0.23	0.18	2
0	0	0	0	0	4	5	6	1	3	0.29	0.17	0.32	0.2	2
0	0	0	0	0	5	0	7	0	2	0.3	0.18	0.28	0.21	1
0	0	0	0	1	5	2	0	1	4	0.23	0.17	0.34	0.16	1
1	0	1	0	0	4	10	10	0	3	0.48	0.2	0.51	0.35	1
			0	0	2	0	4	0	2	0.13	0.06	0.11	0.1	2
1	0	1	0	0	3	1	2	0	2	0.13	0.06	0.12	0.1	1
0	0	0	0	0	4	7	3	0	2	0.23	0.08	0.23	0.17	2
0	0	0	0	0	2	0	1	0	2	0.09	0.04	0.08	0.07	2
1	0	0	0	0	4	7	8	1	3	0.37	0.22	0.4	0.27	2
0	0	0	0	0	4	1	3	0	3	0.18	0.08	0.21	0.13	2
0	0	0	0	0	6	6	10	1	2	0.52	0.39	0.51	0.38	1
0	0	0	0	0	6	0	2	0	1	0.21	0.12	0.18	0.15	1
0	0	0	0	1	4	8	5	1	2	0.4	0.24	0.39	0.28	2
0	0	0	0	0	4	0	3	0	1	0.17	0.08	0.13	0.12	1
0	0	0	0	0	2	1	2	0	3	0.11	0.04	0.12	0.08	2
1	0	0	0	0	2	1	10	0	2	0.26	0.12	0.21	0.19	2
0	0	0	0	0	5	5	4	0	3	0.28	0.12	0.33	0.2	1
0	0	0	0	1	5	0	8	0	2	0.43	0.3	0.4	0.31	1
0	0	0	0	0	4	0	1	1	2	0.13	0.09	0.13	0.1	1
0	0	1	0	1	2	4	6	0	4	0.28	0.12	0.35	0.2	2
0	0	0	0	1	5	0	0	1	1	0.21	0.17	0.18	0.15	2
0	0	0	0	0	5	0	6	1	2	0.27	0.22	0.26	0.19	2
0	0	0	0	0	2	0	0	1	3	0.08	0.05	0.1	0.06	2
1	1	1	0	1	5	7	7	0	4	0.5	0.27	0.61	0.36	2
0	0	0	0	0	4	5	2	0	2	0.19	0.07	0.19	0.14	1
1	1	1	0	1	4	7	4	1	3	0.35	0.21	0.41	0.25	1
0	0	0	0	0	4	6	0	0	2	0.16	0.06	0.17	0.12	2
1	1	1	1	0	3	3	8	0	2	0.38	0.18	0.33	0.27	2
0	0	0	0	0	3	0	1	1	4	0.11	0.07	0.16	0.08	2
0	0	0	0	0	3	0	1	0	3	0.11	0.05	0.13	0.08	1
0	0	0	0	0	5	8	8	0	2	0.44	0.2	0.42	0.31	1
1	0	0	1	1	5	2	2	0	1	0.39	0.21	0.32	0.28	1
0	0	0	0	0	2	3	7	0	3	0.21	0.09	0.22	0.15	2
0	0	0	0	1	3	1	6	1	2	0.29	0.21	0.26	0.2	2
0	0	0	0	0	4	0	0	1	2	0.12	0.08	0.12	0.09	2
0	0	0	0	0	2	2	2	0	2	0.12	0.04	0.11	0.09	2
0	0	0	0	0	5	0	5	1	2	0.24	0.19	0.23	0.17	1
0	0	0	0	0	2	2	8	0	2	0.22	0.1	0.19	0.16	1
0	0	0	1	0	4	0	2	0	2	0.23	0.11	0.21	0.16	1
0	0	0	0	0	2	0	2	1	3	0.11	0.06	0.12	0.08	2
0	0	0	0	0	4	4	1	1	4	0.17	0.09	0.25	0.12	2
0	0	0	0	0	5	1	2	0	2	0.19	0.1	0.19	0.14	2
0	0	0	1	0	4	1	6	0	1	0.34	0.18	0.25	0.24	2
1	0	1	0	0	5	3	8	0	3	0.36	0.2	0.4	0.26	2
0	0	0	0	0	4	0	0	0	2	0.12	0.06	0.12	0.09	2
0	0	0	0	0	1	3	5	0	3	0.14	0.05	0.15	0.11	2
0	0	0	0	0	4	2	3	1	2	0.19	0.12	0.18	0.13	1
0	0	0	0	0	5	3	5	0	3	0.28	0.14	0.32	0.2	1
0	0	0	0	0	4	8	8	1	2	0.39	0.22	0.36	0.28	2
0	0	0	0	0	4	0	1	1	2	0.13	0.09	0.13	0.1	1
0	0	0	0	0	5	1	0	0	3	0.15	0.07	0.19	0.11	2
0	0	0	0	0	3	4	3	1	1	0.17	0.09	0.13	0.13	2
0	0	0	1	0	4	0	3	0	1	0.25	0.12	0.19	0.18	1
0	0	0	0	0	1	0	1	1	2	0.08	0.04	0.07	0.06	2
			1	0	4	0	8	0	2	0.39	0.22	0.34	0.28	2
1	1	1	1	1	5	8	10	1	3	0.72	0.56	0.74	0.57	1
			0	1	4	0	3	0	4	0.24	0.14	0.33	0.17	2
0	0	1	0	0	2	5	5	1	3	0.19	0.09	0.2	0.14	2
0	0	0	0	0	4	4	5	1	2	0.25	0.15	0.24	0.18	2
1	0	1	0	0	4	3	3	0	1	0.19	0.08	0.15	0.14	1
0	0	0	0	0	6	0	0	0	3	0.17	0.09	0.22	0.12	2
0	0	0	0	0	2	0	2	1	1	0.11	0.06	0.07	0.08	2
0	0	0	0	1	4	4	5	1	4	0.34	0.24	0.44	0.24	2
0	0	0	0	0	6	1	7	1	2	0.35	0.3	0.35	0.25	1
0	0	0	0	0	5	2	8	0	2	0.35	0.2	0.33	0.25	1
0	0	0	0	1	4	5	3	1	2	0.3	0.19	0.3	0.21	2
0	0	0	0	0	4	5	1	0	1	0.17	0.06	0.14	0.13	1
1	1	1	1	0	5	2	10	1	1	0.54	0.42	0.42	0.4	1
1	1	1	1	0	4	5	7	1	3	0.43	0.27	0.45	0.31	2
1	1	1	0	0	4	5	4	0	3	0.24	0.1	0.28	0.17	2
0	0	1	0	0	2	5	5	0	2	0.19	0.07	0.17	0.14	2
0	0	0	0	1	5	10	10	1	3	0.64	0.45	0.68	0.49	1
1	1	1	0	1	5	7	8	1	5	0.53	0.38	0.69	0.39	2
0	0	0	0	0	3	5	1	0	1	0.15	0.05	0.12	0.11	1
1	0	0	0	1	3	8	5	0	2	0.35	0.14	0.33	0.25	1
0	0	0	0	1	4	10	7	0	3	0.49	0.22	0.54	0.36	2
1	0	0	0	1	6	0	4	0	3	0.35	0.24	0.42	0.25	2
0	0	0	0	0	4	0	3	0	2	0.17	0.08	0.16	0.12	1
0	0	0	0	0	5	1	2	0	1	0.19	0.1	0.16	0.14	1
0	0	0	0	0	6	3	5	1	2	0.32	0.24	0.33	0.23	2
0	0	0	0	0	5	4	3	0	3	0.24	0.11	0.29	0.17	2
0	0	0	0	0	5	7	5	0	2	0.33	0.14	0.33	0.23	1
0	0	0	0	1	2	0	10	0	2	0.34	0.2	0.28	0.24	1
1	1	1	0	0	4	0	7	0	3	0.25	0.14	0.28	0.18	1
0	0	0	1	0	2	2	3	1	3	0.2	0.11	0.2	0.14	2
0	0	0	0	0	2	3	3	1	2	0.14	0.07	0.12	0.1	2
1	1	1	1	0	5	3	10	0	1	0.55	0.33	0.44	0.41	1
0	0	0	0	0	5	1	4	0	1	0.23	0.12	0.19	0.17	1
0	0	0	0	0	5	3	2	0	3	0.21	0.1	0.26	0.15	2
			0	0	4	0	2	1	2	0.15	0.11	0.15	0.11	2
1	0	1	0	0	5	4	10	1	3	0.44	0.33	0.47	0.32	1
0	0	1	0	0	4	1	6	0	2	0.24	0.12	0.22	0.17	1
0	0	0	0	0	5	0	5	1	2	0.24	0.19	0.23	0.17	2
0	0	0	0	0	5	0	5	0	2	0.24	0.14	0.23	0.17	2
0	0	0	0	0	4	6	8	1	2	0.36	0.22	0.33	0.25	2
0	0	0	0	1	5	7	5	1	3	0.43	0.29	0.5	0.31	1
0	0	0	0	0	3	0	0	0	1	0.1	0.04	0.08	0.08	2
0	0	0	0	0	4	0	0	0	3	0.12	0.06	0.15	0.09	2
0	0	0	0	1	5	8	3	0	2	0.38	0.17	0.4	0.27	1
0	0	0	0	0	6	8	8	0	3	0.49	0.25	0.55	0.35	1
0	0	0	0	0	5	5	8	0	2	0.39	0.2	0.37	0.28	2
0	0	0	0	1	4	2	9	1	2	0.44	0.35	0.4	0.32	2
0	0	1	0	1	4	5	6	1	2	0.39	0.26	0.37	0.28	1
0	0	0	0	0	5	2	7	0	4	0.32	0.18	0.42	0.23	2
0	0	0	0	0	5	0	7	0	3	0.3	0.18	0.33	0.21	2
			0	0	3	0	4	0	1	0.16	0.07	0.11	0.12	2
0	0	0	0	0	3	0	5	0	1	0.18	0.08	0.13	0.13	1
0	0	0	0	1	3	4	5	0	2	0.3	0.14	0.28	0.21	2
1	1	1	1	0	3	4	3	1	3	0.26	0.14	0.27	0.18	2
0	0	0	0	0	1	7	3	1	2	0.14	0.06	0.13	0.1	2
0	0	0	0	1	5	0	8	0	3	0.43	0.3	0.46	0.31	1
1	0	1	1	0	4	5	7	1	2	0.43	0.27	0.39	0.31	2
0	0	0	0	0	2	3	3	0	2	0.14	0.05	0.12	0.1	2
0	0	0	0	0	3	0	2	1	2	0.13	0.08	0.12	0.09	2
0	0	0	0	0	4	9	8	1	3	0.4	0.22	0.44	0.29	1
			0	0	5	8	6	1	3	0.37	0.22	0.43	0.27	2
0	0	0	0	0	4	4	3	0	4	0.2	0.08	0.29	0.15	2
0	0	0	0	1	4	4	4	0	1	0.31	0.15	0.26	0.22	2
0	0	0	0	0	4	3	3	0	1	0.19	0.08	0.15	0.14	2
1	1	1	0	1	4	7	3	0	1	0.32	0.14	0.27	0.23	1
0	0	0	0	0	3	6	5	1	2	0.23	0.12	0.22	0.17	1
0	0	0	0	0	5	5	2	0	3	0.23	0.1	0.28	0.16	1
0	0	0	0	0	5	6	7	1	2	0.38	0.24	0.36	0.27	2
0	0	0	0	0	6	6	5	1	3	0.36	0.24	0.43	0.26	1
0	0	0	0	0	5	0	7	0	2	0.3	0.18	0.28	0.21	1
0	0	0	1	0	5	0	6	1	2	0.38	0.3	0.34	0.27	1
0	0	0	1	0	4	6	7	1	3	0.45	0.27	0.47	0.32	1
			0	0	6	10	8	0	3	0.52	0.25	0.58	0.38	2
0	0	0	0	0	4	4	4	0	5	0.23	0.1	0.37	0.16	2
0	0	0	0	1	4	6	3	0	3	0.31	0.14	0.37	0.22	1
0	0	0	0	0	4	0	7	0	2	0.25	0.14	0.23	0.18	1
0	0	0	0	0	4	6	7	0	2	0.33	0.14	0.31	0.23	2
1	1	1	0	0	4	0	3	1	2	0.17	0.12	0.16	0.12	1
0	0	0	0	0	1	3	2	0	1	0.1	0.03	0.07	0.08	1
1	0	1	0	1	2	2	2	1	3	0.17	0.1	0.19	0.12	2
			0	0	5	6	2	1	3	0.24	0.14	0.3	0.17	2
0	0	0	0	0	6	8	10	1	1	0.55	0.39	0.48	0.41	2
0	0	0	0	0	5	0	1	0	2	0.16	0.08	0.16	0.12	1
0	0	0	0	0	5	2	6	0	3	0.29	0.16	0.33	0.21	2
0	0	0	0	1	5	5	3	1	2	0.34	0.24	0.35	0.24	1
0	0	1	1	0	6	0	1	1	1	0.28	0.21	0.23	0.2	1
1	1	1	0	1	5	0	1	1	1	0.23	0.19	0.2	0.16	1
			0	0	4	7	8	0	4	0.37	0.16	0.46	0.27	2
0	0	0	0	1	3	3	5	0	2	0.28	0.14	0.26	0.2	2
0	0	0	0	0	5	8	2	0	2	0.26	0.1	0.27	0.19	2
			0	1	4	8	5	0	3	0.4	0.17	0.45	0.28	2
0	0	0	0	0	4	10	0	0	4	0.2	0.06	0.3	0.14	1
0	0	0	1	0	4	9	9	0	3	0.55	0.25	0.57	0.41	2
0	0	0	0	0	5	5	8	1	3	0.39	0.27	0.43	0.28	2
0	0	0	0	1	4	2	2	1	3	0.24	0.17	0.28	0.17	1
0	0	0	0	0	2	4	4	0	3	0.16	0.06	0.18	0.12	2
1	0	1	0	0	4	2	8	0	2	0.3	0.16	0.28	0.22	1
0	0	0	0	0	3	0	0	0	2	0.1	0.04	0.1	0.08	2
1	0	0	1	0	4	0	10	1	2	0.45	0.36	0.39	0.33	1
0	0	0	0	0	6	3	3	1	2	0.27	0.19	0.28	0.19	1
0	0	0	0	0	5	9	7	0	3	0.42	0.18	0.47	0.3	2
0	0	0	0	0	6	6	10	1	4	0.52	0.39	0.63	0.38	2
0	0	0	0	0	5	0	7	0	3	0.3	0.18	0.33	0.21	2
0	0	0	0	0	5	4	6	0	2	0.32	0.16	0.31	0.23	2
0	0	0	0	0	3	4	6	1	1	0.24	0.14	0.17	0.17	2
0	0	0	0	0	5	1	0	0	3	0.15	0.07	0.19	0.11	2
0	1	1	0	1	5	6	8	1	2	0.52	0.38	0.5	0.38	1
			0	0	2	0	3	1	3	0.12	0.07	0.13	0.09	2
				0	2	2	2		2					2
0	0	0	0	1	6	3	10	1	3	0.59	0.52	0.63	0.44	1
1	1	1	0	0	5	1	10	1	2	0.4	0.33	0.36	0.28	1
0	0	0	0	1	5	6	8	1	4	0.52	0.38	0.62	0.38	2
0	0	0	0	0	2	5	4	1	4	0.17	0.08	0.23	0.12	2
1	0	0	0	0	2	0	0	1	3	0.08	0.05	0.1	0.06	2
0	0	0	0	0	5	9	6	0	2	0.39	0.16	0.39	0.28	1
0	0	0	0	1	4	8	3	0	4	0.34	0.14	0.46	0.24	1
1	1	1	0	0	5	5	10	1	2	0.46	0.33	0.43	0.33	1
0	0	0	0	1	3	5	2	1	2	0.23	0.13	0.23	0.17	2
1	0	1	0	1	4	5	6	0	3	0.39	0.19	0.43	0.28	1
0	0	0	0	0	3	0	2	1	2	0.13	0.08	0.12	0.09	2
0	0	1	0	0	3	10	9	1	3	0.4	0.2	0.42	0.28	2
0	0	0	0	0	5	2	1	0	2	0.18	0.08	0.18	0.13	2
1	1	0	0	0	5	0	5	1	1	0.24	0.19	0.19	0.17	1
0	0	0	0	0	2	2	4	1	2	0.15	0.08	0.13	0.11	2
0	0	0	1	0	4	7	8	1	3	0.49	0.3	0.51	0.36	1
1	1	1	0	0	5	5	6	0	2	0.33	0.16	0.32	0.24	1
0	0	0	0	0	5	0	1	1	3	0.16	0.12	0.2	0.12	1
1	0	1	0	0	4	0	10	0	3	0.34	0.2	0.35	0.24	1
0	0	0	0	0	6	1	5	0	2	0.3	0.18	0.3	0.21	1
0	0	0	0	0	4	1	5	1	3	0.22	0.15	0.25	0.16	2
1	1	1	0	0	5	5	5	1	3	0.3	0.19	0.35	0.22	1
1	0	1	0	0	5	6	3	1	2	0.26	0.15	0.27	0.19	1
0	0	0	0	0	4	8	4	1	2	0.27	0.14	0.27	0.19	2
1	0	1	0	0	4	0	3	0	1	0.17	0.08	0.13	0.12	1
0	0	0	0	0	4	4	2	0	3	0.18	0.07	0.22	0.13	2
1	0	0	0	0	2	0	5	0	3	0.15	0.07	0.16	0.11	2
1	1	1	1	0	5	3	6	0	1	0.42	0.22	0.33	0.3	1
0	0	0	0	0	3	0	0	0	1	0.1	0.04	0.08	0.08	2
0	0	0	0	0	6	6	6	0	3	0.39	0.2	0.46	0.28	1
0	0	0	0	0	4	0	1	0	1	0.13	0.06	0.11	0.1	2
			0	1	4	7	3	1	2	0.32	0.19	0.32	0.23	2
0	0	0	0	1	2	0	9	1	4	0.31	0.24	0.37	0.22	1
0	0	0	1	1	5	3	3	0	2	0.43	0.24	0.42	0.31	1
0	0	0	0	1	6	10	5	1	2	0.53	0.35	0.55	0.39	2
0	0	0	1	0	4	0	0	0	3	0.18	0.08	0.21	0.13	2
0	0	0	0	0	4	0	3	0	1	0.17	0.08	0.13	0.12	1
1	0	1	0	0	4	5	5	0	3	0.26	0.11	0.3	0.19	2
0	0	0	0	0	3	5	4	1	1	0.2	0.11	0.15	0.14	2
			0	0	3	0	0	1	2	0.1	0.06	0.1	0.08	2
0	0	1	0	0	4	2	1	0	5	0.15	0.06	0.27	0.11	2
			0	1	6	7	8	1	3	0.58	0.45	0.64	0.44	2
0	0	0	0	0	4	5	2	0	3	0.19	0.07	0.23	0.14	1
0	0	0	0	0	5	7	3	1	3	0.27	0.15	0.33	0.2	2
0	0	0	0	1	4	0	7	1	3	0.35	0.29	0.37	0.25	2
0	0	0	1	0	4	0	3	0	1	0.25	0.12	0.19	0.18	1
0	0	0	0	0	6	5	1	0	3	0.24	0.11	0.31	0.17	2
0	0	0	0	0	4	6	6	1	3	0.3	0.17	0.34	0.21	2
1	1	1	0	1	5	4	5	0	3	0.39	0.22	0.45	0.28	2
0	0	0	0	0	5	7	5	1	2	0.33	0.19	0.33	0.23	1
0	0	0	0	0	5	0	5	1	2	0.24	0.19	0.23	0.17	2
0	0	0	0	0	4	8	3	1	1	0.25	0.12	0.2	0.18	1
0	0	1	0	0	4	3	8	1	3	0.32	0.22	0.34	0.23	2
0	0	0	0	0	4	0	5	0	1	0.21	0.11	0.16	0.15	1
1	1	1	1	0	5	10	9	0	3	0.62	0.3	0.65	0.47	2
0	0	0	0	0	2	5	1	0	3	0.12	0.04	0.14	0.09	2
0	0	0	0	0	2	0	1	0	1	0.09	0.04	0.07	0.07	2
0	0	0	0	0	4	10	5	0	4	0.32	0.11	0.43	0.23	2
0	0	0	0	0	6	5	3	1	3	0.29	0.19	0.36	0.21	1
1	1	1	1	0	5	6	5	0	2	0.43	0.2	0.41	0.31	2
1	1	0	0	0	5	2	7	0	2	0.32	0.18	0.3	0.23	2
1	1	1	0	0	4	1	7	0	3	0.27	0.14	0.29	0.19	2
1	1	1	0	0	4	7	8	0	4	0.37	0.16	0.46	0.27	2
0	0	0	0	0	2	0	1	0	3	0.09	0.04	0.11	0.07	2
1	0	0	0	0	5	6	6	0	3	0.34	0.16	0.4	0.25	1
0	0	0	0	0	5	1	8	0	3	0.34	0.2	0.37	0.24	2
0	0	0	0	0	2	2	0	0	2	0.09	0.03	0.09	0.07	1
1	0	0	0	1	4	0	0	0	2	0.18	0.09	0.18	0.13	1
0	0	0	0	0	4	5	3	1	3	0.21	0.12	0.25	0.15	1
0	0	1	0	0	4	5	5	0	1	0.26	0.11	0.21	0.19	1
0	0	0	0	0	5	5	7	1	2	0.36	0.24	0.35	0.26	2
1	1	1	0	1	5	5	8	1	2	0.5	0.38	0.49	0.37	2
1	1	1	0	0	6	5	5	1	3	0.35	0.24	0.41	0.25	1
0	0	0	0	0	5	1	2	0	4	0.19	0.1	0.28	0.14	1
0	0	0	0	0	2	0	1	0	2	0.09	0.04	0.08	0.07	2
0	0	0	0	1	4	6	7	0	3	0.43	0.22	0.47	0.31	1
0	0	0	0	0	2	0	0	0	4	0.08	0.03	0.12	0.06	2
			0	0	4	3	3	1	4	0.19	0.12	0.28	0.14	2
1	1	1	0	0	5	10	7	1	3	0.43	0.24	0.49	0.31	2
			0	0	3	5	4	1	2	0.2	0.11	0.19	0.14	2
0	0	1	1	0	4	0	10	1	3	0.45	0.36	0.45	0.33	1
0	0	0	0	0	5	0	1	1	2	0.16	0.12	0.16	0.12	1
0	0	0	0	0	4	5	7	1	3	0.31	0.19	0.35	0.22	2
0	0	0	1	0	2	1	4	1	1	0.21	0.12	0.14	0.15	2
0	0	0	0	0	4	0	2	0	2	0.15	0.07	0.15	0.11	1
0	0	0	0	0	5	0	7	0	2	0.3	0.18	0.28	0.21	1
1	0	0	0	0	4	3	7	1	2	0.29	0.19	0.27	0.21	2
0	0	0	0	0	4	0	1	0	2	0.13	0.06	0.13	0.1	1
0	0	0	0	1	6	10	0	1	2	0.37	0.21	0.41	0.26	2
1	1	1	0	0	5	0	9	1	4	0.35	0.3	0.44	0.25	1
0	0	0	0	0	3	4	1	1	3	0.14	0.07	0.17	0.1	2
0	0	0	0	0	2	0	2	1	3	0.11	0.06	0.12	0.08	2
0	0	0	0	1	4	4	7	0	1	0.4	0.22	0.32	0.29	1
0	0	0	0	0	4	2	3	0	3	0.19	0.08	0.22	0.13	2
0	0	0	0	0	5	2	5	0	3	0.27	0.14	0.31	0.19	1
0	0	0	0	0	5	0	5	0	3	0.24	0.14	0.28	0.17	2
0	0	0	0	1	4	5	2	1	2	0.27	0.17	0.27	0.19	1
1	0	1	0	1	4	4	6	0	2	0.37	0.19	0.35	0.27	1
			0	0	4	0	6	0	3	0.23	0.12	0.25	0.16	2
0	0	0	0	0	4	0	2	1	3	0.15	0.11	0.18	0.11	1
1	1	1	0	1	4	5	6	1	3	0.39	0.26	0.43	0.28	1
0	0	0	0	0	4	1	2	0	1	0.16	0.07	0.13	0.12	2
1	0	0	0	0	4	0	2	1	3	0.15	0.11	0.18	0.11	2
1	1	1	0	1	6	10	0	1	1	0.37	0.21	0.35	0.26	1
0	0	0	0	0	4	0	2	1	2	0.15	0.11	0.15	0.11	1
0	0	1	0	0	4	0	7	0	2	0.25	0.14	0.23	0.18	1
			0	0	5	0	8	0	3	0.32	0.2	0.35	0.23	2
0	0	0	0	0	5	5	10	1	4	0.46	0.33	0.55	0.33	2
0	0	0	0	0	4	6	8	0	3	0.36	0.16	0.39	0.25	2
0	0	0	0	0	3	0	4	1	2	0.16	0.11	0.14	0.12	2
0	0	0	0	0	5	8	6	0	2	0.37	0.16	0.37	0.27	1
1	1	1	1	1	6	10	9	1	1	0.76	0.59	0.69	0.61	1
0	0	0	0	0	3	0	2	1	3	0.13	0.08	0.14	0.09	2
1	1	0	0	0	4	0	1	1	3	0.13	0.09	0.16	0.1	2
1	1	1	1	0	4	3	3	0	4	0.28	0.12	0.37	0.2	1
0	0	0	0	1	5	1	2	0	2	0.27	0.15	0.27	0.19	1
1	0	0	0	0	4	0	5	1	4	0.21	0.15	0.28	0.15	2
1	0	1	0	1	4	5	8	0	3	0.45	0.24	0.48	0.32	1
0	0	0	0	0	5	4	4	0	3	0.26	0.12	0.31	0.19	1
0	0	0	0	0	4	0	5	0	1	0.21	0.11	0.16	0.15	2
0	0	0	0	0	5	1	1	0	2	0.17	0.08	0.17	0.12	2
0	0	1	0	0	3	5	5	1	3	0.22	0.12	0.25	0.16	2
0	0	0	1	0	1	5	7	0	4	0.29	0.1	0.33	0.21	2
0	0	0	0	0	4	0	5	0	2	0.21	0.11	0.19	0.15	2
0	0	0	0	0	2	0	7	1	3	0.18	0.12	0.19	0.13	1
1	1	1	0	0	4	9	7	1	3	0.37	0.19	0.41	0.26	1
1	0	1	0	0	5	7	3	0	3	0.27	0.11	0.33	0.2	2
0	0	0	0	0	3	4	3	1	4	0.17	0.09	0.24	0.13	1
0	0	1	1	1	3	6	6	0	3	0.47	0.22	0.49	0.34	2
			0	0	3	2	3	0	3	0.16	0.07	0.18	0.11	2
0	0	0	0	0	2	3	1	0	1	0.11	0.04	0.08	0.08	2
0	0	0	0	0	1	0	3	0	2	0.1	0.04	0.08	0.07	2
1	1	1	0	0	2	3	6	0	2	0.19	0.07	0.16	0.14	2
0	0	0	0	0	2	5	4	0	2	0.17	0.06	0.15	0.12	2
0	0	0	0	0	5	9	7	1	2	0.42	0.24	0.41	0.3	1
1	1	0	1	1	6	8	4	1	1	0.59	0.42	0.53	0.44	1
0	0	0	0	0	4	3	2	0	3	0.18	0.07	0.21	0.13	1
0	0	0	0	0	4	0	3	0	3	0.17	0.08	0.2	0.12	2
0	0	0	0	0	6	7	5	0	2	0.38	0.18	0.39	0.27	1
0	0	0	1	0	3	0	2	0	2	0.19	0.08	0.17	0.14	1
			0	1	5	0	6	0	1	0.36	0.24	0.3	0.26	2
0	0	0	0	1	4	3	2	0	2	0.25	0.12	0.25	0.18	1
0	0	0	0	1	4	0	3	0	2	0.24	0.14	0.23	0.17	1
0	0	0	0	0	4	0	1	0	1	0.13	0.06	0.11	0.1	1
0	0	0	0	0	5	0	2	0	3	0.18	0.1	0.22	0.13	2
1	1	1	0	0	4	6	7	0	4	0.33	0.14	0.42	0.23	2
0	0	0	0	0	4	5	8	0	2	0.34	0.16	0.32	0.25	2
0	0	0	0	0	4	0	1	0	2	0.13	0.06	0.13	0.1	1
0	0	0	0	0	3	2	5	0	2	0.19	0.08	0.17	0.14	1
0	0	0	0	0	5	0	10	1	3	0.38	0.33	0.41	0.27	2
0	0	0	1	0	3	2	2	0	1	0.21	0.08	0.15	0.15	1
1	1	1	0	0	2	0	7	0	2	0.18	0.09	0.15	0.13	2
0	0	0	0	0	1	0	1	0	3	0.08	0.03	0.08	0.06	2
0	0	0	0	1	3	8	5	0	2	0.35	0.14	0.33	0.25	2
0	0	0	0	0	5	7	7	1	2	0.39	0.24	0.38	0.28	2
0	0	0	0	0	5	1	1	1	1	0.17	0.12	0.14	0.12	1
1	1	1	0	0	4	8	5	0	3	0.3	0.11	0.34	0.21	1
0	0	0	0	0	6	0	0	0	3	0.17	0.09	0.22	0.12	1
0	0	0	0	0	5	0	5	0	1	0.24	0.14	0.19	0.17	2
1	0	1	1	0	6	4	10	1	1	0.61	0.49	0.52	0.47	1
1	0	1	1	1	5	9	7	0	2	0.65	0.36	0.63	0.5	1
0	0	0	0	1	3	0	4	0	3	0.23	0.12	0.25	0.16	2
0	0	0	0	0	4	2	8	0	2	0.3	0.16	0.28	0.22	2
0	0	0	0	0	5	1	2	0	3	0.19	0.1	0.23	0.14	1
0	0	0	0	0	5	5	7	0	2	0.36	0.18	0.35	0.26	1
0	0	0	0	1	3	1	1	1	2	0.17	0.12	0.17	0.13	2
1	1	1	0	1	6	10	10	1	3	0.68	0.52	0.73	0.53	2
0	0	0	0	0	5	0	4	0	2	0.22	0.12	0.22	0.16	2
0	0	0	0	1	5	4	10	1	2	0.55	0.45	0.52	0.41	1
0	0	0	0	0	4	0	5	0	3	0.21	0.11	0.23	0.15	2
0	0	0	0	0	6	0	8	1	3	0.37	0.33	0.41	0.26	1
0	0	0	0	0	5	6	7	0	1	0.38	0.18	0.31	0.27	1
0	0	0	0	0	6	1	7	1	2	0.35	0.3	0.35	0.25	1
0	0	0	0	0	4	0	6	0	2	0.23	0.12	0.21	0.16	2
0	0	0	0	0	2	1	3	0	5	0.12	0.05	0.2	0.09	2
1	0	0	0	0	5	3	6	1	3	0.31	0.22	0.35	0.22	1
0	0	0	0	1	3	0	3	0	3	0.2	0.11	0.23	0.15	2
0	0	0	0	1	5	5	8	1	3	0.5	0.38	0.55	0.37	2
0	0	0	0	0	4	0	0	0	2	0.12	0.06	0.12	0.09	2
0	0	0	0	0	2	3	2	0	3	0.12	0.04	0.14	0.09	2
0	0	0	0	0	5	5	10	0	1	0.46	0.25	0.37	0.33	1
0	0	0	0	0	5	0	0	1	1	0.14	0.11	0.12	0.11	1
0	0	0	1	0	3	5	4	0	3	0.29	0.11	0.31	0.21	2
0	0	0	0	0	3	5	3	0	2	0.18	0.07	0.17	0.13	2
0	0	0	0	0	4	1	3	0	3	0.18	0.08	0.21	0.13	2
1	1	1	0	0	5	8	2	1	2	0.26	0.14	0.27	0.19	1
0	0	0	0	0	4	3	8	1	3	0.32	0.22	0.34	0.23	2
1	0	0	0	0	3	5	7	0	4	0.27	0.11	0.35	0.19	2
0	0	1	0	1	5	8	3	0	1	0.38	0.17	0.34	0.27	1
0	0	0	0	0	6	8	10	1	3	0.55	0.39	0.6	0.41	2
0	0	0	0	1	4	0	0	1	1	0.18	0.13	0.14	0.13	1
0	0	0	0	0	2	4	4	0	3	0.16	0.06	0.18	0.12	2
			0	1	4	10	10	1	5	0.59	0.39	0.73	0.44	2
0	0	0	0	0	4	0	3	1	1	0.17	0.12	0.13	0.12	2
0	0	1	0	1	5	0	4	0	1	0.31	0.19	0.25	0.22	1
0	0	0	0	0	2	4	6	0	1	0.2	0.07	0.14	0.14	2
0	0	0	1	0	5	8	6	0	2	0.49	0.22	0.47	0.36	2
			0	0	5	7	8	1	5	0.42	0.27	0.59	0.3	2
0	0	0	0	0	4	2	1	0	2	0.15	0.06	0.15	0.11	2
0	0	0	0	0	3	4	0	0	2	0.12	0.04	0.12	0.09	2
0	0	0	0	0	2	0	0	1	3	0.08	0.05	0.1	0.06	2
1	1	0	0	0	5	0	7	0	2	0.3	0.18	0.28	0.21	1
0	0	0	0	0	2	6	5	0	1	0.2	0.07	0.14	0.14	2
0	0	0	0	1	2	1	3	1	3	0.18	0.12	0.2	0.13	2
1	0	0	0	1	4	2	3	0	2	0.26	0.14	0.26	0.19	1
1	1	0	0	1	2	8	0	1	3	0.18	0.08	0.22	0.13	2
0	0	0	0	1	4	3	2	1	3	0.25	0.17	0.3	0.18	2
0	0	0	1	0	5	0	1	1	1	0.24	0.17	0.19	0.17	1
1	1	1	0	1	3	3	4	0	3	0.26	0.12	0.29	0.18	1
0	0	1	0	0	5	1	3	1	2	0.21	0.15	0.21	0.15	1
0	0	0	0	1	4	3	7	1	2	0.39	0.29	0.36	0.28	2
0	0	1	0	0	4	3	1	1	3	0.16	0.09	0.19	0.11	1
0	0	0	0	0	5	0	1	1	2	0.16	0.12	0.16	0.12	2
0	0	1	1	1	3	2	4	0	2	0.35	0.17	0.31	0.25	2
0	0	0	0	0	5	1	2	1	4	0.19	0.14	0.28	0.14	2
0	0	0	0	1	4	7	9	1	4	0.51	0.35	0.6	0.38	1
1	0	0	0	0	4	6	3	1	5	0.22	0.12	0.37	0.16	1
1	0	0	0	0	5	9	0	0	3	0.22	0.07	0.29	0.16	2
0	0	0	0	0	4	8	8	0	3	0.39	0.16	0.42	0.28	2
0	0	1	0	0	5	4	6	1	2	0.32	0.22	0.31	0.23	1
0	0	0	0	1	3	6	3	0	3	0.27	0.11	0.31	0.19	2
0	0	0	0	0	4	7	6	0	4	0.31	0.12	0.41	0.22	2
0	0	0	0	0	4	0	4	0	1	0.19	0.1	0.14	0.14	1
1	1	1	0	0	5	0	5	0	2	0.24	0.14	0.23	0.17	1
1	1	1	1	1	5	1	8	1	3	0.57	0.49	0.58	0.42	1
			0	0	3	2	5	0	3	0.19	0.08	0.21	0.14	2
0	0	0	0	1	4	0	4	0	3	0.26	0.15	0.3	0.19	1
0	0	0	0	0	5	5	7	0	2	0.36	0.18	0.35	0.26	2
0	0	0	0	1	2	0	0	1	3	0.12	0.08	0.14	0.09	2
0	0	0	0	0	5	1	9	1	3	0.37	0.3	0.39	0.26	2
0	0	0	0	0	4	3	3	0	2	0.19	0.08	0.19	0.14	1
1	1	1	1	0	5	2	7	1	2	0.44	0.33	0.4	0.32	1
0	0	0	0	0	4	0	2	0	2	0.15	0.07	0.15	0.11	1
1	1	1	0	0	2	0	3	1	2	0.12	0.07	0.1	0.09	2
0	0	0	0	0	3	0	5	0	2	0.18	0.08	0.16	0.13	2
1	0	1	0	0	5	10	3	0	3	0.31	0.11	0.38	0.22	1
1	1	1	0	0	4	0	5	0	4	0.21	0.11	0.28	0.15	2
0	0	0	0	0	3	1	3	1	2	0.15	0.09	0.14	0.11	2
1	0	0	0	0	4	0	1	1	2	0.13	0.09	0.13	0.1	1
0	0	0	0	0	3	6	5	0	3	0.23	0.08	0.26	0.17	2
0	0	0	0	1	2	3	2	1	5	0.18	0.1	0.29	0.13	2
0	0	0	0	1	4	3	6	1	3	0.36	0.26	0.4	0.26	2
0	0	0	0	0	4	10	6	1	1	0.35	0.17	0.29	0.25	1
0	0	0	0	0	4	0	10	0	2	0.34	0.2	0.29	0.24	1
1	0	1	0	0	2	7	7	0	1	0.25	0.09	0.18	0.18	1
0	0	0	0	0	4	4	5	0	3	0.25	0.11	0.28	0.18	2
0	0	0	0	0	5	4	7	0	1	0.35	0.18	0.28	0.25	1
0	0	0	0	0	4	1	6	0	2	0.24	0.12	0.22	0.17	2
1	0		0		2	0	6	0	2					2
0	0	0	0	1	5	1	2	1	1	0.27	0.21	0.22	0.19	1
0	0	0	0	0	6	6	10	0	2	0.52	0.3	0.51	0.38	2
0	0	0	0	0	5	0	6	1	1	0.27	0.22	0.21	0.19	2
0	0	0	0	0	4	1	5	0	3	0.22	0.11	0.25	0.16	2
0	0	0	1	0	4	8	8	0	2	0.51	0.22	0.47	0.37	1
0	0	1	1	0	5	5	2	1	2	0.33	0.19	0.32	0.23	1
1	1	1	1	1	5	7	3	1	2	0.49	0.32	0.49	0.36	1
0	0	0	0	0	5	2	5	0	3	0.27	0.14	0.31	0.19	2
0	0	0	0	0	4	4	3	0	3	0.2	0.08	0.24	0.15	2
0	0	0	0	0	3	0	0	0	2	0.1	0.04	0.1	0.08	2
0	0	0	1	0	4	0	2	0	2	0.23	0.11	0.21	0.16	2
0	0	0	0	0	4	7	7	0	3	0.34	0.14	0.38	0.24	2
1	1	1	0	0	4	6	6	0	3	0.3	0.12	0.34	0.21	1
1	1	0	0	0	4	0	3	0	2	0.17	0.08	0.16	0.12	1
1	0	0	1	0	5	8	6	1	2	0.49	0.3	0.47	0.36	1
0	0	0	0	1	3	5	5	0	3	0.31	0.14	0.34	0.22	1
0	0	0	0	0	5	0	0	0	2	0.14	0.07	0.15	0.11	1
0	0	0	0	0	3	4	2	0	3	0.15	0.06	0.18	0.11	2
0	0	0	0	0	5	4	6	1	2	0.32	0.22	0.31	0.23	1
1	1	1	0	0	5	8	6	0	2	0.37	0.16	0.37	0.27	1
0	0	0	0	0	3	4	7	0	3	0.26	0.11	0.28	0.19	2
0	0	0	0	0	4	0	4	0	3	0.19	0.1	0.21	0.14	2
1	1	0	0	0	4	0	5	0	3	0.21	0.11	0.23	0.15	2
1	1	1	0	0	4	2	3	1	4	0.19	0.12	0.26	0.13	2
1	1	1	0	0	4	5	0	0	2	0.16	0.06	0.16	0.11	2
1	0	1	0	0	4	8	8	0	3	0.39	0.16	0.42	0.28	2
0	0	0	0	1	5	0	1	1	1	0.23	0.19	0.2	0.16	1
0	0		0	0	5	0	5	0	3	0.24	0.14	0.28	0.17	2
0	0	0	0	0	3	4	5	0	2	0.21	0.08	0.19	0.15	2
0	0	0	0	0	6	0	5	1	3	0.28	0.24	0.34	0.2	1
0	0	1	0	0	2	5	5	0	4	0.19	0.07	0.25	0.14	2
			0	1	1	3	5	0	3	0.21	0.08	0.22	0.15	2
0	0	0	0	0	4	3	4	0	2	0.22	0.1	0.21	0.15	2
0	0	0	0	0	3	0	2	0	3	0.13	0.06	0.14	0.09	2
0	0	0	1	0	4	1	2	0	2	0.24	0.11	0.22	0.17	1
0	0	0	0	0	2	1	1	1	2	0.1	0.06	0.09	0.07	1
0	0	0	0	0	4	2	2	0	2	0.17	0.07	0.16	0.12	1
0	0	0	1	0	4	0	8	1	1	0.39	0.3	0.28	0.28	2
0	0	0	0	0	5	2	5	1	2	0.27	0.19	0.26	0.19	2
1	0	1	0	0	4	5	10	0	2	0.4	0.2	0.37	0.29	2
0	0	0	0	1	5	0	8	1	2	0.43	0.38	0.4	0.31	2
1	1	1	0	1	4	6	6	1	3	0.4	0.26	0.44	0.29	2
1	1	1	0	0	4	6	6	0	3	0.3	0.12	0.34	0.21	2
			0	1	4	5	0	1	2	0.22	0.13	0.23	0.16	2
0	0	0	0	1	5	2	6	0	1	0.39	0.24	0.33	0.28	2
0	0	0	0	0	2	0	2	1	2	0.11	0.06	0.09	0.08	2
0	0	0	0	1	3	6	3	0	3	0.27	0.11	0.31	0.19	1
0	0	0	0	0	3	3	9	1	1	0.3	0.2	0.22	0.21	2
0	0	0	0	0	3	4	7	0	2	0.26	0.11	0.23	0.19	1
0	0	0	0	1	3	5	4	0	3	0.28	0.12	0.32	0.2	2
1	1	0	0	1	5	3	3	0	4	0.32	0.17	0.44	0.23	2
			0	0	3	3	4	0	3	0.18	0.07	0.21	0.13	2
0	0	0	0	0	5	0	1	0	2	0.16	0.08	0.16	0.12	1
0	0	0	0	0	4	1	1	0	1	0.14	0.06	0.11	0.1	1
0	0	0	0	0	5	5	8	0	2	0.39	0.2	0.37	0.28	1
0	0	0	0	1	4	2	5	0	2	0.32	0.17	0.3	0.22	1
0	0	0	0	0	4	0	0	0	2	0.12	0.06	0.12	0.09	2
0	0	0	1	1	5	8	4	1	2	0.54	0.35	0.53	0.4	1
0	0	0	0	1	4	1	1	1	2	0.2	0.15	0.2	0.15	1
1	1	1	1	0	6	3	8	1	2	0.54	0.42	0.51	0.4	1
0	0	0	1	0	5	0	4	1	2	0.32	0.24	0.3	0.23	1
0	0	0	0	0	3	5	5	0	2	0.22	0.08	0.21	0.16	2
0	0	0	0	0	2	4	5	1	2	0.18	0.09	0.16	0.13	2
0	0	0	0	0	5	0	3	0	3	0.2	0.11	0.24	0.14	2
1	0	1	1	1	6	8	7	1	3	0.68	0.52	0.72	0.53	1
0	1	1	0	0	4	8	6	0	3	0.33	0.12	0.37	0.23	1
0	0	0	0	0	5	0	9	0	3	0.35	0.22	0.38	0.25	1
0	0	0	0	1	4	10	2	0	2	0.33	0.12	0.35	0.24	1
1	1	0	0	0	4	5	5	0	2	0.26	0.11	0.25	0.19	2
0	0	0	0	0	1	3	4	0	2	0.13	0.04	0.11	0.1	2
1	0	1	0	0	5	7	8	1	3	0.42	0.27	0.47	0.3	2
0	0	0	0	1	3	1	2	0	2	0.19	0.09	0.18	0.14	1
1	1	1	0	0	5	10	10	1	3	0.53	0.33	0.57	0.39	1
0	0	0	0	0	5	7	10	1	1	0.49	0.33	0.4	0.35	1
1	1	1	0	1	6	10	10	1	4	0.68	0.52	0.78	0.53	1
0	0	0	0	0	5	0	2	0	2	0.18	0.1	0.18	0.13	2
0	0	0	0	0	5	0	3	1	2	0.2	0.15	0.2	0.14	1
1	1	1	0	0	4	2	2	0	2	0.17	0.07	0.16	0.12	1
0	0	0	0	0	6	7	10	1	2	0.54	0.39	0.52	0.4	1
1	1	1	0	0	3	5	8	1	2	0.3	0.17	0.27	0.21	2
0	0	0	0	0	4	0	2	0	3	0.15	0.07	0.18	0.11	2
0	0	0	0	0	6	2	5	1	3	0.31	0.24	0.37	0.22	1
1	0	1	0	0	4	2	6	0	3	0.25	0.12	0.28	0.18	1
0	1	1	1	0	4	0	1	0	2	0.2	0.1	0.19	0.15	1
0	0	0	0	0	4	7	5	1	3	0.29	0.15	0.33	0.2	1
0	0	0	1	0	4	6	3	0	5	0.32	0.12	0.48	0.23	1
1	1	1	0	0	5	0	7	0	2	0.3	0.18	0.28	0.21	2
0	0	0	1	0	4	5	6	1	2	0.4	0.24	0.36	0.29	1
1	1	1	1	0	5	0	7	1	3	0.41	0.33	0.43	0.29	1
			1	1	4	8	8	1	2	0.62	0.42	0.58	0.47	2
0	0	0	0	1	2	10	7	0	1	0.39	0.14	0.3	0.28	2
0	0	0	0	0	2	1	5	1	2	0.16	0.09	0.13	0.11	2
0	0	0	1	0	4	6	5	0	3	0.38	0.16	0.41	0.27	1
1	0	0	0	0	4	6	9	0	3	0.39	0.18	0.41	0.28	2
0	0	0	0	1	5	6	9	0	3	0.55	0.33	0.59	0.41	1
1	0	1	1	0	5	6	8	1	2	0.53	0.36	0.49	0.39	1
0	0	0	0	0	2	0	2	1	4	0.11	0.06	0.14	0.08	2
0	0	0	0	0	4	6	7	0	3	0.33	0.14	0.36	0.23	2
1	0	1	1	0	5	7	3	1	3	0.38	0.22	0.43	0.27	1
0	0	0	0	0	4	0	6	0	3	0.23	0.12	0.25	0.16	2
0	0	0	0	0	2	2	0	0	4	0.09	0.03	0.13	0.07	2
0	0	0	0	1	4	7	5	0	3	0.38	0.17	0.43	0.27	2
			0	1	6	5	3	0	2	0.39	0.21	0.41	0.28	2
0	0	1	0	0	4	0	7	0	3	0.25	0.14	0.28	0.18	2
1	1	1	1	1	5	8	10	1	3	0.72	0.56	0.74	0.57	1
0	0	0	0	1	5	0	0	1	3	0.21	0.17	0.26	0.15	1
1	1	1	1	0	5	8	7	1	3	0.53	0.33	0.56	0.39	1
1	0	0	0	0	4	2	4	0	2	0.21	0.1	0.2	0.15	2
0	0	0	0	0	3	6	2	0	3	0.17	0.06	0.2	0.12	2
0	0	1	0	0	4	7	2	0	2	0.21	0.07	0.21	0.15	1
			0	0	5	10	9	0	4	0.5	0.22	0.6	0.36	2
0	0	0	0	0	5	1	1	0	1	0.17	0.08	0.14	0.12	1
0	0	0	0	0	4	6	7	0	3	0.33	0.14	0.36	0.23	1
0	0	0	0	0	2	3	5	0	2	0.17	0.07	0.15	0.12	2
0	0	0	0	0	4	3	1	1	3	0.16	0.09	0.19	0.11	1
1	1	1	0	0	5	7	4	1	3	0.3	0.17	0.36	0.21	2
0	0	0	0	0	5	0	6	0	3	0.27	0.16	0.3	0.19	1
0	0	0	0	0	5	2	1	0	1	0.18	0.08	0.15	0.13	1
1	1	1	0	0	4	2	7	0	2	0.28	0.14	0.25	0.2	1
0	0	0	0	1	2	0	2	1	1	0.15	0.1	0.11	0.11	1
0	0	0	0	0	3	5	4	0	2	0.2	0.07	0.19	0.14	2
0	0	0	0	0	4	0	5	0	2	0.21	0.11	0.19	0.15	1
1	0	1	0	0	2	2	7	1	1	0.2	0.12	0.14	0.15	2
0	0	0	0	1	3	6	5	0	4	0.32	0.14	0.42	0.23	2
0	0	0	0	0	5	6	6	1	1	0.34	0.22	0.29	0.25	1
1	1	1	0	0	3	10	7	0	2	0.33	0.11	0.31	0.24	1
0	0	0	0	0	4	6	7	0	3	0.33	0.14	0.36	0.23	2
0	0	0	0	0	5	8	0	0	1	0.21	0.07	0.19	0.15	2
0	0	0	0	0	4	0	3	0	3	0.17	0.08	0.2	0.12	2
0	0	0	0	0	6	0	5	0	3	0.28	0.18	0.34	0.2	2
1	0	1	0	0	3	4	3	0	2	0.17	0.07	0.16	0.13	2
0	0	0	0	0	5	6	8	1	3	0.41	0.27	0.45	0.29	1
1	0	1	1	0	5	4	7	0	3	0.47	0.25	0.49	0.34	1
0	0	0	0	1	6	3	8	1	2	0.52	0.45	0.51	0.38	1
1	1	1	0	1	5	7	9	1	2	0.56	0.42	0.55	0.42	1
0	0	0	0	0	4	6	5	1	3	0.27	0.15	0.31	0.19	2
0	0	0	0	0	4	7	7	0	1	0.34	0.14	0.27	0.24	1
1	0	1	0	0	4	1	1	0	3	0.14	0.06	0.17	0.1	1
0	0	0	0	0	4	0	3	0	2	0.17	0.08	0.16	0.12	2
0	0	0	0	0	4	3	2	0	2	0.18	0.07	0.17	0.13	2
1	0	0	0	0	3	2	7	0	3	0.24	0.11	0.25	0.17	2
0	0	0	0	0	6	0	4	0	3	0.26	0.16	0.31	0.18	1
1	0	1	0	0	4	0	5	0		0.21	0.11		0.15	2
0	0	0	0	0	6	10	9	0	3	0.55	0.27	0.61	0.41	2
0	0	0	0	1	4	3	3	0	3	0.27	0.14	0.32	0.19	1
0	0	1	0	0	5	6	6	0	3	0.34	0.16	0.4	0.25	1
0	0	0	0	1	3	7	8	0	3	0.43	0.19	0.45	0.31	1
1	0	1	1	0	5	7	8	0	4	0.54	0.27	0.63	0.4	1
0	0	0	0	0	4	5	5	0	2	0.26	0.11	0.25	0.19	2
0	0	0	0	0	4	0	6	1	3	0.23	0.17	0.25	0.16	2
0	0	0	0	0	5	4	0	1	3	0.18	0.11	0.23	0.13	1
0	0	0	1	0	5	1	4	1	3	0.33	0.24	0.36	0.24	1
0	0	0	0	0	5	0	5	0	3	0.24	0.14	0.28	0.17	1
1	1	1	0	1	6	8	4	1	3	0.47	0.32	0.55	0.34	1
0	0	0	0	0	3	0	0	1	2	0.1	0.06	0.1	0.08	2
0	0	0	0	1	5	10	7	1	1	0.54	0.35	0.48	0.4	1
0	0	0	0	1	1	0	2	0	1	0.13	0.06	0.09	0.1	2
0	0	0	1	0	3	2	2	0	3	0.21	0.08	0.23	0.15	1
0	0	0	0	0	4	2	7	0	2	0.28	0.14	0.25	0.2	2
0	0	0	0	0	5	0	5	1	3	0.24	0.19	0.28	0.17	1
0	0	0	0	0	4	0	6	0	2	0.23	0.12	0.21	0.16	2
0	0	0	1	0	4	7	7	1	2	0.46	0.27	0.42	0.33	2
0	0	0	0	1	2	0	3	1	3	0.17	0.12	0.19	0.13	2
1	0	1	0	0	5	7	5	1	3	0.33	0.19	0.39	0.23	2
0	0	0	0	0	5	10	5	0	2	0.37	0.14	0.38	0.26	2
1	1	0	0	0	4	5	8	1	2	0.34	0.22	0.32	0.25	2
0	0	0	0	0	4	0	0	0	2	0.12	0.06	0.12	0.09	2
0	0	0	0	0	4	1	1	0	3	0.14	0.06	0.17	0.1	2
0	0	0	0	0	5	7	4	0	1	0.3	0.12	0.26	0.21	1
0	0	0	0	0	5	5	4	0	2	0.28	0.12	0.28	0.2	1
0	0	0	0	0	4	5	7	0	2	0.31	0.14	0.29	0.22	1
1	1	0	1		5	0	5	0	3					2
0	1	1	0	0	4	3	1	1	2	0.16	0.09	0.16	0.11	1
1	0	1	0	0	6	3	8	0	3	0.41	0.25	0.46	0.3	1
0	0	0	0	0	4	0	3	1	2	0.17	0.12	0.16	0.12	2
0	0	0	0	0	3	5	0	0	1	0.13	0.04	0.1	0.1	2
1	0	1	0	0	6	0	8	1	4	0.37	0.33	0.47	0.26	1
0	0	0	0	0	2	1	1	0	3	0.1	0.04	0.11	0.07	2
[truncated: 883 more rows]
